# Supplementary material for: A hexaaza macrocyclic ligand containing acetohydrazide pendants for Ln(iii) complexation in aqueous solution. Solid-state and solution structures and DFT calculations
Source: Royal Society of Chemistry journal article supplement (doi:10.1039/b800953h), 2008-01-01
Supplement: b800953h.pdf [file b800953h.pdf]

# **A hexaaza macrocyclic ligand containing acetohydrazide pendants for Ln(III) complexation in aqueous solution. Solid state and solution structures and DFT calculations**

Cristina Núñez,<sup>a</sup> Rufina Bastida,<sup>a</sup> Alejandro Macías,<sup>a</sup> Marta Mato-Iglesias,<sup>b</sup> Carlos Platas-Iglesias<sup>\*b</sup> and Laura Valencia<sup>\*c</sup>

Electronic Supplementary Information

| $(\lambda\lambda) - [\text{La}(\text{L})]^{3+}$ |               | (0 imaginary frequencies) |           |   |
|-------------------------------------------------|---------------|---------------------------|-----------|---|
| Center Number                                   | Atomic Number | Coordinates (Angstroms)   |           |   |
|                                                 |               | X                         | Y         | Z |
| 1                                               | 57            | 0.001924                  | 0.000004  |   |
| 0.000034                                        |               |                           |           |   |
| 2                                               | 7             | -0.001685                 | 2.661487  |   |
| 0.011490                                        |               |                           |           |   |
| 3                                               | 7             | 0.886796                  | 1.227349  | - |
| 2.285172                                        |               |                           |           |   |
| 4                                               | 7             | -0.886772                 | -1.205590 | - |
| 2.295457                                        |               |                           |           |   |
| 5                                               | 7             | 0.000608                  | -2.661485 | - |
| 0.011590                                        |               |                           |           |   |
| 6                                               | 7             | 0.887765                  | -1.226597 |   |
| 2.285221                                        |               |                           |           |   |
| 7                                               | 7             | -0.887979                 | 1.204845  |   |
| 2.295417                                        |               |                           |           |   |
| 8                                               | 8             | 2.273709                  | -0.799131 | - |
| 1.132089                                        |               |                           |           |   |
| 9                                               | 8             | -2.270704                 | 0.812345  | - |
| 1.123140                                        |               |                           |           |   |
| 10                                              | 8             | 2.273039                  | 0.801046  |   |
| 1.132260                                        |               |                           |           |   |
| 11                                              | 8             | -2.270193                 | -0.814195 |   |
| 1.122996                                        |               |                           |           |   |
| 12                                              | 6             | -0.139471                 | 3.339277  |   |
| 1.180109                                        |               |                           |           |   |
| 13                                              | 6             | -0.163191                 | 4.732896  |   |
| 1.215164                                        |               |                           |           |   |
| 14                                              | 1             | -0.290745                 | 5.253000  |   |
| 2.156134                                        |               |                           |           |   |
| 15                                              | 6             | -0.007676                 | 5.443520  |   |
| 0.023638                                        |               |                           |           |   |
| 16                                              | 1             | -0.009902                 | 6.526542  |   |
| 0.028376                                        |               |                           |           |   |
| 17                                              | 6             | 0.150665                  | 4.744012  | - |
| 1.174039                                        |               |                           |           |   |
| 18                                              | 1             | 0.275870                  | 5.272827  | - |
| 2.110461                                        |               |                           |           |   |
| 19                                              | 6             | 0.132924                  | 3.350003  | - |
| 1.151163                                        |               |                           |           |   |
| 20                                              | 6             | 0.179390                  | 2.549149  | - |
| 2.439324                                        |               |                           |           |   |
| 21                                              | 1             | -0.852120                 | 2.319451  | - |
| 2.725344                                        |               |                           |           |   |
| 22                                              | 1             | 0.638871                  | 3.147484  | - |
| 3.237741                                        |               |                           |           |   |
| 23                                              | 6             | 0.674810                  | 0.372605  | - |
| 3.521228                                        |               |                           |           |   |
| 24                                              | 1             | 1.478407                  | -0.364506 | - |
| 3.556092                                        |               |                           |           |   |
| 25                                              | 1             | 0.760369                  | 0.990326  | - |
| 4.426774                                        |               |                           |           |   |
| 26                                              | 6             | -0.674370                 | -0.340815 | - |
| 3.524432                                        |               |                           |           |   |
| 27                                              | 1             | -1.478114                 | 0.396396  | - |
| 3.553828                                        |               |                           |           |   |
| 28                                              | 1             | -0.759413                 | -0.951153 | - |
| 4.435007                                        |               |                           |           |   |
| 29                                              | 6             | -0.180907                 | -2.526949 | - |
| 2.461140                                        |               |                           |           |   |

|          |   |           |           |   |
|----------|---|-----------|-----------|---|
| 30       | 1 | 0.851026  | -2.295955 | - |
| 2.744682 |   |           |           |   |
| 31       | 1 | -0.640838 | -3.117385 | - |
| 3.265144 |   |           |           |   |
| 32       | 6 | -0.136269 | -3.339392 | - |
| 1.180227 |   |           |           |   |
| 33       | 6 | -0.158223 | -4.733047 | - |
| 1.215341 |   |           |           |   |
| 34       | 1 | -0.285085 | -5.253273 | - |
| 2.156339 |   |           |           |   |
| 35       | 6 | -0.001869 | -5.443523 | - |
| 0.023847 |   |           |           |   |
| 36       | 1 | -0.002726 | -6.526546 | - |
| 0.028633 |   |           |           |   |
| 37       | 6 | 0.155511  | -4.743865 | - |
| 1.173879 |   |           |           |   |
| 38       | 1 | 0.281313  | -5.272560 | - |
| 2.110287 |   |           |           |   |
| 39       | 6 | 0.136008  | -3.349886 | - |
| 1.151059 |   |           |           |   |
| 40       | 6 | 0.181409  | -2.548981 | - |
| 2.439228 |   |           |           |   |
| 41       | 1 | -0.850374 | -2.320120 | - |
| 2.724938 |   |           |           |   |
| 42       | 1 | 0.641160  | -3.146910 | - |
| 3.237791 |   |           |           |   |
| 43       | 6 | 0.674937  | -0.372031 | - |
| 3.521254 |   |           |           |   |
| 44       | 1 | 1.477904  | 0.365762  | - |
| 3.556180 |   |           |           |   |
| 45       | 1 | 0.760949  | -0.989681 | - |
| 4.426807 |   |           |           |   |
| 46       | 6 | -0.674852 | 0.340246  | - |
| 3.524388 |   |           |           |   |
| 47       | 1 | -1.477969 | -0.397649 | - |
| 3.553759 |   |           |           |   |
| 48       | 1 | -0.760438 | 0.950509  | - |
| 4.434963 |   |           |           |   |
| 49       | 6 | -0.183164 | 2.526781  | - |
| 2.461025 |   |           |           |   |
| 50       | 1 | 0.849017  | 2.296610  | - |
| 2.744340 |   |           |           |   |
| 51       | 1 | -0.643423 | 3.116812  | - |
| 3.265134 |   |           |           |   |
| 52       | 6 | 2.365885  | 1.431155  | - |
| 2.108695 |   |           |           |   |
| 53       | 1 | 2.527483  | 2.120484  | - |
| 1.271907 |   |           |           |   |
| 54       | 1 | 2.854519  | 1.839010  | - |
| 2.997608 |   |           |           |   |
| 55       | 6 | 2.969096  | 0.081629  | - |
| 1.742378 |   |           |           |   |
| 56       | 6 | -2.365977 | -1.408973 | - |
| 2.119588 |   |           |           |   |
| 57       | 1 | -2.527777 | -2.104261 | - |
| 1.287811 |   |           |           |   |
| 58       | 1 | -2.855812 | -1.809198 | - |
| 3.011274 |   |           |           |   |
| 59       | 6 | -2.966999 | -0.061581 | - |
| 1.742132 |   |           |           |   |
| 60       | 6 | 2.367039  | -1.429154 | - |
| 2.108900 |   |           |           |   |
| 61       | 1 | 2.529302  | -2.118386 | - |

|          |   |           |           |   |
|----------|---|-----------|-----------|---|
| 1.272163 |   |           |           |   |
| 62       | 1 | 2.855942  | -1.836555 |   |
| 2.997873 |   |           |           |   |
| 63       | 6 | 2.969138  | -0.079127 |   |
| 1.742581 |   |           |           |   |
| 64       | 6 | -2.367352 | 1.406989  |   |
| 2.119562 |   |           |           |   |
| 65       | 1 | -2.529736 | 2.102176  |   |
| 1.287814 |   |           |           |   |
| 66       | 1 | -2.857536 | 1.806759  |   |
| 3.011259 |   |           |           |   |
| 67       | 6 | -2.967225 | 0.059099  |   |
| 1.742047 |   |           |           |   |
| 68       | 7 | 4.245145  | 0.152825  |   |
| 2.083202 |   |           |           |   |
| 69       | 7 | 4.985121  | -0.833247 |   |
| 2.818380 |   |           |           |   |
| 70       | 1 | 5.296391  | -0.452937 |   |
| 3.717848 |   |           |           |   |
| 71       | 1 | 5.766842  | -1.191814 |   |
| 2.262286 |   |           |           |   |
| 72       | 7 | 4.245302  | -0.149261 | - |
| 2.082979 |   |           |           |   |
| 73       | 7 | -4.242355 | 0.174907  | - |
| 2.082239 |   |           |           |   |
| 74       | 1 | -4.645138 | 1.089114  | - |
| 1.853845 |   |           |           |   |
| 75       | 7 | -4.982870 | -0.803688 | - |
| 2.826812 |   |           |           |   |
| 76       | 1 | -5.765765 | -1.165902 | - |
| 2.274742 |   |           |           |   |
| 77       | 1 | -5.292595 | -0.415107 | - |
| 3.723275 |   |           |           |   |
| 78       | 7 | -4.242376 | -0.178502 |   |
| 2.082151 |   |           |           |   |
| 79       | 1 | -4.644370 | -1.093045 |   |
| 1.853712 |   |           |           |   |
| 80       | 7 | -4.983728 | 0.799402  |   |
| 2.826797 |   |           |           |   |
| 81       | 1 | -5.766948 | 1.160972  |   |
| 2.274763 |   |           |           |   |
| 82       | 1 | -5.293104 | 0.410489  |   |
| 3.723239 |   |           |           |   |
| 83       | 1 | 4.648682  | 1.068623  |   |
| 1.862683 |   |           |           |   |
| 84       | 7 | 4.984485  | 0.837448  | - |
| 2.818098 |   |           |           |   |
| 85       | 1 | 5.296114  | 0.457424  | - |
| 3.717563 |   |           |           |   |
| 86       | 1 | 5.765877  | 1.196659  | - |
| 2.261958 |   |           |           |   |
| 87       | 1 | 4.649599  | -1.064723 | - |
| 1.862454 |   |           |           |   |

---

HF = -2103.1525066 Hartree  
Zero-point correction = 0.732786  
Sum of electronic and thermal Enthalpies = -2102.376482  
Sum of electronic and thermal Free Energies = -2102.491071

$(\lambda\delta) - [\text{La}(\text{L})]^{3+}$  (0 imaginary frequencies)

---

| Center<br>Number | Atomic<br>Number | Coordinates (Angstroms) |           |   |
|------------------|------------------|-------------------------|-----------|---|
|                  |                  | X                       | Y         | Z |
| 1<br>0.063220    | 57               | -0.000034               | -0.002583 | - |
| 2<br>0.909428    | 6                | -3.017991               | -1.747506 |   |
| 3<br>0.855115    | 6                | -4.301877               | -2.283042 |   |
| 4<br>0.382861    | 6                | -4.836766               | -2.644860 | - |
| 5<br>1.527812    | 6                | -4.068716               | -2.453416 | - |
| 6<br>1.412049    | 6                | -2.805331               | -1.869272 | - |
| 7<br>2.663531    | 6                | -2.018907               | -1.552982 | - |
| 8<br>3.652072    | 6                | 0.088689                | -0.784835 | - |
| 9<br>3.662770    | 6                | -0.116176               | 0.729264  | - |
| 10<br>2.699476   | 6                | 1.996463                | 1.515111  | - |
| 11<br>1.458196   | 6                | 2.790237                | 1.852518  | - |
| 12<br>1.590985   | 6                | 4.051304                | 2.438071  | - |
| 13<br>0.453930   | 6                | 4.825788                | 2.649669  | - |
| 14<br>0.792861   | 6                | 4.299464                | 2.305951  |   |
| 15<br>0.863620   | 6                | 3.017515                | 1.767654  |   |
| 16<br>2.197798   | 6                | 2.340768                | 1.583843  |   |
| 17<br>3.522925   | 6                | 0.628243                | 0.476505  |   |
| 18<br>3.532246   | 6                | -0.606233               | -0.425979 |   |
| 19<br>2.236138   | 6                | -2.332026               | -1.545349 |   |
| 20<br>2.192827   | 6                | 0.090427                | -2.764385 | - |
| 21<br>2.384913   | 6                | 2.383058                | -0.880690 |   |
| 22<br>2.386649   | 6                | -2.363667               | 0.921745  |   |
| 23<br>0.212628   | 7                | -2.281469               | -1.516724 | - |
| 24<br>2.433953   | 7                | -0.540043               | -1.425594 | - |
| 25<br>2.457913   | 7                | 0.519488                | 1.387975  | - |
| 26<br>0.250164   | 7                | 2.274731                | 1.517401  | - |
| 27<br>2.292232   | 7                | 1.499356                | 0.330387  |   |
| 28<br>2.305591   | 7                | -1.484908               | -0.294134 |   |
| 29<br>1.766674   | 1                | -4.864788               | -2.438100 |   |
| 30<br>0.449336   | 1                | -5.826984               | -3.078078 | - |

|          |   |           |           |   |
|----------|---|-----------|-----------|---|
| 31       | 1 | -4.444451 | -2.743125 | - |
| 2.501191 |   |           |           |   |
| 32       | 1 | -2.365217 | -0.582562 | - |
| 3.031991 |   |           |           |   |
| 33       | 1 | -2.231225 | -2.303092 | - |
| 3.439128 |   |           |           |   |
| 34       | 1 | 1.154503  | -1.018142 | - |
| 3.641804 |   |           |           |   |
| 35       | 1 | -0.334125 | -1.217380 | - |
| 4.570645 |   |           |           |   |
| 36       | 1 | 0.301574  | 1.147998  | - |
| 4.590030 |   |           |           |   |
| 37       | 1 | -1.181855 | 0.963114  | - |
| 3.650262 |   |           |           |   |
| 38       | 1 | 2.201717  | 2.253897  | - |
| 3.487763 |   |           |           |   |
| 39       | 1 | 2.342541  | 0.539966  | - |
| 3.055648 |   |           |           |   |
| 40       | 1 | 4.420263  | 2.713375  | - |
| 2.571118 |   |           |           |   |
| 41       | 1 | 5.814366  | 3.084455  | - |
| 0.533325 |   |           |           |   |
| 42       | 1 | 4.867530  | 2.476896  |   |
| 1.698361 |   |           |           |   |
| 43       | 1 | 1.641994  | 2.417566  |   |
| 2.316022 |   |           |           |   |
| 44       | 1 | 3.079461  | 1.623004  |   |
| 3.009115 |   |           |           |   |
| 45       | 1 | 0.327001  | 1.522414  |   |
| 3.580893 |   |           |           |   |
| 46       | 1 | 1.218347  | 0.262573  |   |
| 4.427302 |   |           |           |   |
| 47       | 1 | -1.190516 | -0.201335 |   |
| 4.437818 |   |           |           |   |
| 48       | 1 | -0.304742 | -1.471136 |   |
| 3.600027 |   |           |           |   |
| 49       | 1 | -3.065519 | -1.568580 |   |
| 3.052735 |   |           |           |   |
| 50       | 1 | -1.635732 | -2.379845 |   |
| 2.363315 |   |           |           |   |
| 51       | 1 | 0.060056  | -3.402197 | - |
| 3.088263 |   |           |           |   |
| 52       | 1 | 2.889816  | -0.934763 |   |
| 3.358883 |   |           |           |   |
| 53       | 1 | 3.144649  | -0.795405 |   |
| 1.598838 |   |           |           |   |
| 54       | 1 | -2.865099 | 0.990706  |   |
| 3.362385 |   |           |           |   |
| 55       | 1 | -3.129275 | 0.828788  |   |
| 1.605421 |   |           |           |   |
| 56       | 6 | 1.573842  | -2.146736 |   |
| 2.089973 |   |           |           |   |
| 57       | 6 | 1.528785  | -2.536676 | - |
| 1.706538 |   |           |           |   |
| 58       | 6 | -1.549842 | 2.179381  |   |
| 2.070550 |   |           |           |   |
| 59       | 6 | -0.111940 | 2.728719  | - |
| 2.230540 |   |           |           |   |
| 60       | 1 | -0.089343 | 3.354390  | - |
| 3.134729 |   |           |           |   |
| 61       | 1 | 0.446281  | 3.241205  | - |
| 1.437494 |   |           |           |   |
| 62       | 6 | -1.546182 | 2.505407  | - |

|          |   |           |           |   |  |
|----------|---|-----------|-----------|---|--|
| 1.730418 |   |           |           |   |  |
| 63       | 8 | 0.622988  | -2.108220 |   |  |
| 1.256326 |   |           |           |   |  |
| 64       | 8 | 1.834547  | -1.448688 | - |  |
| 1.132296 |   |           |           |   |  |
| 65       | 8 | -1.846375 | 1.424552  | - |  |
| 1.140106 |   |           |           |   |  |
| 66       | 8 | -0.612641 | 2.127302  |   |  |
| 1.222481 |   |           |           |   |  |
| 67       | 7 | -1.910277 | 3.291118  |   |  |
| 2.730840 |   |           |           |   |  |
| 68       | 1 | -2.673367 | 3.258449  |   |  |
| 3.411472 |   |           |           |   |  |
| 69       | 7 | -1.237043 | 4.524754  |   |  |
| 2.454363 |   |           |           |   |  |
| 70       | 1 | -1.889866 | 5.207570  |   |  |
| 2.059069 |   |           |           |   |  |
| 71       | 1 | -0.781070 | 4.877921  |   |  |
| 3.300971 |   |           |           |   |  |
| 72       | 7 | -2.407359 | 3.505609  | - |  |
| 1.956424 |   |           |           |   |  |
| 73       | 1 | -2.122942 | 4.313232  | - |  |
| 2.515740 |   |           |           |   |  |
| 74       | 7 | -3.731702 | 3.434557  | - |  |
| 1.408196 |   |           |           |   |  |
| 75       | 1 | -3.948086 | 4.306948  | - |  |
| 0.917924 |   |           |           |   |  |
| 76       | 1 | -4.412956 | 3.235962  | - |  |
| 2.148241 |   |           |           |   |  |
| 77       | 7 | 2.386991  | -3.540616 | - |  |
| 1.926244 |   |           |           |   |  |
| 78       | 1 | 2.097035  | -4.355419 | - |  |
| 2.472149 |   |           |           |   |  |
| 79       | 7 | 3.715596  | -3.464159 | - |  |
| 1.389065 |   |           |           |   |  |
| 80       | 1 | 3.934642  | -4.330498 | - |  |
| 0.889310 |   |           |           |   |  |
| 81       | 1 | 4.391266  | -3.276303 | - |  |
| 2.137021 |   |           |           |   |  |
| 82       | 7 | 1.954627  | -3.251000 |   |  |
| 2.751254 |   |           |           |   |  |
| 83       | 1 | 2.725567  | -3.206436 |   |  |
| 3.422270 |   |           |           |   |  |
| 84       | 7 | 1.292384  | -4.493660 |   |  |
| 2.488826 |   |           |           |   |  |
| 85       | 1 | 1.952826  | -5.175858 |   |  |
| 2.105393 |   |           |           |   |  |
| 86       | 1 | 0.836281  | -4.839539 |   |  |
| 3.338434 |   |           |           |   |  |
| 87       | 1 | -0.462958 | -3.265021 | - |  |
| 1.388890 |   |           |           |   |  |

-----  
 HF = -2103.1254227 Hartree  
 Zero-point correction = 0.731127  
 Sum of electronic and thermal Enthalpies = -2102.349992  
 Sum of electronic and thermal Free Energies = -2102.468150

( $\lambda\lambda$ ) - [Ce(L)]<sup>3+</sup> (0 imaginary frequencies)

-----  

| Center<br>Number | Atomic<br>Number | Coordinates (Angstroms) |   |   |
|------------------|------------------|-------------------------|---|---|
|                  |                  | X                       | Y | Z |

---

|          |    |           |           |   |
|----------|----|-----------|-----------|---|
| 1        | 58 | 0.000242  | 0.000001  | - |
| 0.000004 |    |           |           |   |
| 2        | 7  | 0.000020  | -2.649452 | - |
| 0.002229 |    |           |           |   |
| 3        | 7  | 0.893042  | -1.205758 |   |
| 2.279478 |    |           |           |   |
| 4        | 7  | -0.892819 | 1.201616  |   |
| 2.281625 |    |           |           |   |
| 5        | 7  | 0.000220  | 2.649453  |   |
| 0.002211 |    |           |           |   |
| 6        | 7  | 0.893224  | 1.205690  | - |
| 2.279470 |    |           |           |   |
| 7        | 7  | -0.892843 | -1.201546 | - |
| 2.281679 |    |           |           |   |
| 8        | 8  | 2.250883  | 0.824288  |   |
| 1.108123 |    |           |           |   |
| 9        | 8  | -2.250277 | -0.826518 |   |
| 1.106482 |    |           |           |   |
| 10       | 8  | 2.250837  | -0.824474 | - |
| 1.108091 |    |           |           |   |
| 11       | 8  | -2.250202 | 0.826690  | - |
| 1.106511 |    |           |           |   |
| 12       | 6  | -0.146100 | -3.333467 | - |
| 1.166157 |    |           |           |   |
| 13       | 6  | -0.168821 | -4.727139 | - |
| 1.196384 |    |           |           |   |
| 14       | 1  | -0.303719 | -5.249860 | - |
| 2.134871 |    |           |           |   |
| 15       | 6  | -0.002360 | -5.433923 | - |
| 0.004387 |    |           |           |   |
| 16       | 1  | -0.003254 | -6.516912 | - |
| 0.005231 |    |           |           |   |
| 17       | 6  | 0.165252  | -4.729277 |   |
| 1.188688 |    |           |           |   |
| 18       | 1  | 0.299259  | -5.253670 |   |
| 2.126373 |    |           |           |   |
| 19       | 6  | 0.144888  | -3.335500 |   |
| 1.160621 |    |           |           |   |
| 20       | 6  | 0.199135  | -2.532575 |   |
| 2.445380 |    |           |           |   |
| 21       | 1  | -0.830854 | -2.311331 |   |
| 2.742915 |    |           |           |   |
| 22       | 1  | 0.672902  | -3.124329 |   |
| 3.240324 |    |           |           |   |
| 23       | 6  | 0.678443  | -0.351759 |   |
| 3.515167 |    |           |           |   |
| 24       | 1  | 1.474439  | 0.393707  |   |
| 3.546953 |    |           |           |   |
| 25       | 1  | 0.772713  | -0.967378 |   |
| 4.421184 |    |           |           |   |
| 26       | 6  | -0.677828 | 0.345710  |   |
| 3.515916 |    |           |           |   |
| 27       | 1  | -1.473847 | -0.399781 |   |
| 3.546838 |    |           |           |   |
| 28       | 1  | -0.771799 | 0.959928  |   |
| 4.422913 |    |           |           |   |
| 29       | 6  | -0.199213 | 2.528375  |   |
| 2.449524 |    |           |           |   |
| 30       | 1  | 0.830984  | 2.306883  |   |
| 2.746157 |    |           |           |   |
| 31       | 1  | -0.672776 | 3.118589  |   |
| 3.245726 |    |           |           |   |



|          |   |           |           |   |
|----------|---|-----------|-----------|---|
| 32       | 6 | -0.145845 | 3.333484  |   |
| 1.166135 |   |           |           |   |
| 33       | 6 | -0.168370 | 4.727160  |   |
| 1.196366 |   |           |           |   |
| 34       | 1 | -0.303228 | 5.249896  |   |
| 2.134852 |   |           |           |   |
| 35       | 6 | -0.001771 | 5.433924  |   |
| 0.004380 |   |           |           |   |
| 36       | 1 | -0.002513 | 6.516914  |   |
| 0.005228 |   |           |           |   |
| 37       | 6 | 0.165779  | 4.729260  | - |
| 1.188694 |   |           |           |   |
| 38       | 1 | 0.299885  | 5.253637  | - |
| 2.126373 |   |           |           |   |
| 39       | 6 | 0.145217  | 3.335486  | - |
| 1.160633 |   |           |           |   |
| 40       | 6 | 0.199410  | 2.532553  | - |
| 2.445386 |   |           |           |   |
| 41       | 1 | -0.830597 | 2.311380  | - |
| 2.742913 |   |           |           |   |
| 42       | 1 | 0.673214  | 3.124269  | - |
| 3.240336 |   |           |           |   |
| 43       | 6 | 0.678594  | 0.351696  | - |
| 3.515154 |   |           |           |   |
| 44       | 1 | 1.474512  | -0.393857 | - |
| 3.546881 |   |           |           |   |
| 45       | 1 | 0.772974  | 0.967284  | - |
| 4.421179 |   |           |           |   |
| 46       | 6 | -0.677738 | -0.345641 | - |
| 3.515949 |   |           |           |   |
| 47       | 1 | -1.473677 | 0.399935  | - |
| 3.546862 |   |           |           |   |
| 48       | 1 | -0.771761 | -0.959827 | - |
| 4.422962 |   |           |           |   |
| 49       | 6 | -0.199313 | -2.528350 | - |
| 2.449544 |   |           |           |   |
| 50       | 1 | 0.830922  | -2.306924 | - |
| 2.746090 |   |           |           |   |
| 51       | 1 | -0.672853 | -3.118525 | - |
| 3.245787 |   |           |           |   |
| 52       | 6 | 2.373285  | -1.396867 |   |
| 2.098155 |   |           |           |   |
| 53       | 1 | 2.537598  | -2.085001 |   |
| 1.261158 |   |           |           |   |
| 54       | 1 | 2.869121  | -1.797232 |   |
| 2.986350 |   |           |           |   |
| 55       | 6 | 2.958278  | -0.041511 |   |
| 1.726452 |   |           |           |   |
| 56       | 6 | -2.373147 | 1.392588  |   |
| 2.100777 |   |           |           |   |
| 57       | 1 | -2.537728 | 2.082085  |   |
| 1.264955 |   |           |           |   |
| 58       | 1 | -2.869046 | 1.791264  |   |
| 2.989693 |   |           |           |   |
| 59       | 6 | -2.957669 | 0.037789  |   |
| 1.726898 |   |           |           |   |
| 60       | 6 | 2.373476  | 1.396694  | - |
| 2.098114 |   |           |           |   |
| 61       | 1 | 2.537821  | 2.084853  | - |
| 1.261146 |   |           |           |   |
| 62       | 1 | 2.869365  | 1.796986  | - |
| 2.986315 |   |           |           |   |
| 63       | 6 | 2.958333  | 0.041261  | - |

|          |   |           |           |   |  |
|----------|---|-----------|-----------|---|--|
| 1.726392 |   |           |           |   |  |
| 64       | 6 | -2.373192 | -1.392419 | - |  |
| 2.100905 |   |           |           |   |  |
| 65       | 1 | -2.537864 | -2.081946 | - |  |
| 1.265125 |   |           |           |   |  |
| 66       | 1 | -2.869080 | -1.791017 | - |  |
| 2.989862 |   |           |           |   |  |
| 67       | 6 | -2.957666 | -0.037548 | - |  |
| 1.726940 |   |           |           |   |  |
| 68       | 7 | 4.229239  | -0.212580 | - |  |
| 2.069662 |   |           |           |   |  |
| 69       | 7 | 4.981637  | 0.757162  | - |  |
| 2.813921 |   |           |           |   |  |
| 70       | 1 | 5.283160  | 0.366283  | - |  |
| 3.712189 |   |           |           |   |  |
| 71       | 1 | 5.771342  | 1.106459  | - |  |
| 2.263224 |   |           |           |   |  |
| 72       | 7 | 4.229184  | 0.212230  |   |  |
| 2.069801 |   |           |           |   |  |
| 73       | 7 | -4.228249 | -0.217183 |   |  |
| 2.070537 |   |           |           |   |  |
| 74       | 1 | -4.618436 | -1.137363 |   |  |
| 1.844016 |   |           |           |   |  |
| 75       | 7 | -4.980619 | 0.750921  |   |  |
| 2.816953 |   |           |           |   |  |
| 76       | 1 | -5.770668 | 1.101007  |   |  |
| 2.267249 |   |           |           |   |  |
| 77       | 1 | -5.281638 | 0.358255  |   |  |
| 3.714607 |   |           |           |   |  |
| 78       | 7 | -4.228230 | 0.217529  | - |  |
| 2.070560 |   |           |           |   |  |
| 79       | 1 | -4.618344 | 1.137735  | - |  |
| 1.844016 |   |           |           |   |  |
| 80       | 7 | -4.980677 | -0.750495 | - |  |
| 2.816998 |   |           |           |   |  |
| 81       | 1 | -5.770752 | -1.100538 | - |  |
| 2.267301 |   |           |           |   |  |
| 82       | 1 | -5.281668 | -0.357784 | - |  |
| 3.714643 |   |           |           |   |  |
| 83       | 1 | 4.619597  | -1.133068 | - |  |
| 1.844690 |   |           |           |   |  |
| 84       | 7 | 4.981471  | -0.757585 |   |  |
| 2.814078 |   |           |           |   |  |
| 85       | 1 | 5.282984  | -0.366744 |   |  |
| 3.712366 |   |           |           |   |  |
| 86       | 1 | 5.771177  | -1.106929 |   |  |
| 2.263410 |   |           |           |   |  |
| 87       | 1 | 4.619624  | 1.132690  |   |  |
| 1.844861 |   |           |           |   |  |

-----  
 HF = -2103.8050032 Hartree  
 Zero-point correction = 0.733033  
 Sum of electronic and thermal Enthalpies = -2103.028787  
 Sum of electronic and thermal Free Energies = -2103.143185

$(\lambda\delta) - [\text{Ce}(\text{L})]^{3+}$  (0 imaginary frequencies)

-----  

| Center<br>Number | Atomic<br>Number | Coordinates (Angstroms) |   |   |
|------------------|------------------|-------------------------|---|---|
|                  |                  | X                       | Y | Z |

 -----

|          |    |           |           |   |
|----------|----|-----------|-----------|---|
| 1        | 58 | -0.000083 | -0.003843 | - |
| 0.061588 |    |           |           |   |
| 2        | 6  | -3.064913 | -1.651834 |   |
| 0.916898 |    |           |           |   |
| 3        | 6  | -4.361801 | -2.155138 |   |
| 0.863234 |    |           |           |   |
| 4        | 6  | -4.900710 | -2.518392 | - |
| 0.372294 |    |           |           |   |
| 5        | 6  | -4.122197 | -2.360287 | - |
| 1.515006 |    |           |           |   |
| 6        | 6  | -2.845405 | -1.805994 | - |
| 1.399713 |    |           |           |   |
| 7        | 6  | -2.047687 | -1.525690 | - |
| 2.651169 |    |           |           |   |
| 8        | 6  | 0.072132  | -0.803651 | - |
| 3.638600 |    |           |           |   |
| 9        | 6  | -0.107391 | 0.713010  | - |
| 3.656414 |    |           |           |   |
| 10       | 6  | 2.018776  | 1.463437  | - |
| 2.704065 |    |           |           |   |
| 11       | 6  | 2.824857  | 1.778423  | - |
| 1.466252 |    |           |           |   |
| 12       | 6  | 4.099335  | 2.332848  | - |
| 1.604965 |    |           |           |   |
| 13       | 6  | 4.884962  | 2.523444  | - |
| 0.472147 |    |           |           |   |
| 14       | 6  | 4.355551  | 2.191219  |   |
| 0.776243 |    |           |           |   |
| 15       | 6  | 3.060808  | 1.685338  |   |
| 0.852218 |    |           |           |   |
| 16       | 6  | 2.387401  | 1.519457  |   |
| 2.189102 |    |           |           |   |
| 17       | 6  | 0.642602  | 0.472191  |   |
| 3.515671 |    |           |           |   |
| 18       | 6  | -0.616579 | -0.391997 |   |
| 3.528774 |    |           |           |   |
| 19       | 6  | -2.380960 | -1.456095 |   |
| 2.244173 |    |           |           |   |
| 20       | 6  | 0.036655  | -2.770461 | - |
| 2.162034 |    |           |           |   |
| 21       | 6  | 2.347996  | -0.943668 |   |
| 2.375013 |    |           |           |   |
| 22       | 6  | -2.322734 | 1.009515  |   |
| 2.371375 |    |           |           |   |
| 23       | 7  | -2.316795 | -1.451198 | - |
| 0.203119 |    |           |           |   |
| 24       | 7  | -0.568494 | -1.422496 | - |
| 2.415580 |    |           |           |   |
| 25       | 7  | 0.541978  | 1.361269  | - |
| 2.453458 |    |           |           |   |
| 26       | 7  | 2.305461  | 1.453874  | - |
| 0.257114 |    |           |           |   |
| 27       | 7  | 1.504207  | 0.295839  |   |
| 2.282190 |    |           |           |   |
| 28       | 7  | -1.487879 | -0.237646 |   |
| 2.299799 |    |           |           |   |
| 29       | 1  | -4.931779 | -2.284930 |   |
| 1.774373 |    |           |           |   |
| 30       | 1  | -5.901246 | -2.927238 | - |
| 0.438321 |    |           |           |   |
| 31       | 1  | -4.499648 | -2.652467 | - |
| 2.486999 |    |           |           |   |
| 32       | 1  | -2.373908 | -0.555571 | - |

|          |   |           |           |   |
|----------|---|-----------|-----------|---|
| 3.037880 |   |           |           |   |
| 33       | 1 | -2.269700 | -2.284172 | - |
| 3.415828 |   |           |           |   |
| 34       | 1 | 1.133701  | -1.055663 | - |
| 3.627100 |   |           |           |   |
| 35       | 1 | -0.358788 | -1.235091 | - |
| 4.553850 |   |           |           |   |
| 36       | 1 | 0.316936  | 1.122094  | - |
| 4.584921 |   |           |           |   |
| 37       | 1 | -1.168759 | 0.965831  | - |
| 3.643535 |   |           |           |   |
| 38       | 1 | 2.231780  | 2.203249  | - |
| 3.489322 |   |           |           |   |
| 39       | 1 | 2.345286  | 0.484959  | - |
| 3.069064 |   |           |           |   |
| 40       | 1 | 4.469427  | 2.600028  | - |
| 2.586940 |   |           |           |   |
| 41       | 1 | 5.883783  | 2.933264  | - |
| 0.555774 |   |           |           |   |
| 42       | 1 | 4.931476  | 2.346491  |   |
| 1.679622 |   |           |           |   |
| 43       | 1 | 1.719659  | 2.376998  |   |
| 2.315148 |   |           |           |   |
| 44       | 1 | 3.131313  | 1.528878  |   |
| 2.996481 |   |           |           |   |
| 45       | 1 | 0.373085  | 1.526934  |   |
| 3.571479 |   |           |           |   |
| 46       | 1 | 1.228844  | 0.243532  |   |
| 4.418946 |   |           |           |   |
| 47       | 1 | -1.195280 | -0.147019 |   |
| 4.432673 |   |           |           |   |
| 48       | 1 | -0.346557 | -1.445488 |   |
| 3.600465 |   |           |           |   |
| 49       | 1 | -3.119173 | -1.438743 |   |
| 3.056633 |   |           |           |   |
| 50       | 1 | -1.718858 | -2.315126 |   |
| 2.388458 |   |           |           |   |
| 51       | 1 | -0.002490 | -3.415017 | - |
| 3.052273 |   |           |           |   |
| 52       | 1 | 2.849501  | -1.016270 |   |
| 3.350476 |   |           |           |   |
| 53       | 1 | 3.113908  | -0.881743 |   |
| 1.590986 |   |           |           |   |
| 54       | 1 | -2.818505 | 1.105846  |   |
| 3.347659 |   |           |           |   |
| 55       | 1 | -3.092709 | 0.936080  |   |
| 1.592378 |   |           |           |   |
| 56       | 6 | 1.499601  | -2.182041 |   |
| 2.075105 |   |           |           |   |
| 57       | 6 | 1.476310  | -2.562877 | - |
| 1.673242 |   |           |           |   |
| 58       | 6 | -1.465992 | 2.233606  |   |
| 2.040567 |   |           |           |   |
| 59       | 6 | -0.064667 | 2.713242  | - |
| 2.225331 |   |           |           |   |
| 60       | 1 | -0.035841 | 3.336943  | - |
| 3.130676 |   |           |           |   |
| 61       | 1 | 0.506181  | 3.216696  | - |
| 1.435470 |   |           |           |   |
| 62       | 6 | -1.498720 | 2.514132  | - |
| 1.717140 |   |           |           |   |
| 63       | 8 | 0.543931  | -2.107508 |   |
| 1.249111 |   |           |           |   |

|          |   |           |           |   |
|----------|---|-----------|-----------|---|
| 64       | 8 | 1.797287  | -1.475313 | - |
| 1.105641 |   |           |           |   |
| 65       | 8 | -1.812269 | 1.438520  | - |
| 1.123345 |   |           |           |   |
| 66       | 8 | -0.531611 | 2.138384  |   |
| 1.192765 |   |           |           |   |
| 67       | 7 | -1.787452 | 3.366119  |   |
| 2.685697 |   |           |           |   |
| 68       | 1 | -2.550170 | 3.368655  |   |
| 3.367534 |   |           |           |   |
| 69       | 7 | -1.072540 | 4.572271  |   |
| 2.392620 |   |           |           |   |
| 70       | 1 | -1.703233 | 5.274047  |   |
| 1.994591 |   |           |           |   |
| 71       | 1 | -0.598601 | 4.917621  |   |
| 3.232617 |   |           |           |   |
| 72       | 7 | -2.346663 | 3.526092  | - |
| 1.939389 |   |           |           |   |
| 73       | 1 | -2.056065 | 4.326547  | - |
| 2.505697 |   |           |           |   |
| 74       | 7 | -3.666946 | 3.477666  | - |
| 1.377712 |   |           |           |   |
| 75       | 1 | -3.869670 | 4.361345  | - |
| 0.901807 |   |           |           |   |
| 76       | 1 | -4.356919 | 3.274355  | - |
| 2.108531 |   |           |           |   |
| 77       | 7 | 2.320586  | -3.580512 | - |
| 1.882836 |   |           |           |   |
| 78       | 1 | 2.021808  | -4.393829 | - |
| 2.426131 |   |           |           |   |
| 79       | 7 | 3.647745  | -3.520927 | - |
| 1.338841 |   |           |           |   |
| 80       | 1 | 3.855178  | -4.393288 | - |
| 0.844474 |   |           |           |   |
| 81       | 1 | 4.328800  | -3.336457 | - |
| 2.082898 |   |           |           |   |
| 82       | 7 | 1.850954  | -3.303107 |   |
| 2.724292 |   |           |           |   |
| 83       | 1 | 2.623315  | -3.286186 |   |
| 3.394960 |   |           |           |   |
| 84       | 7 | 1.153110  | -4.524246 |   |
| 2.452583 |   |           |           |   |
| 85       | 1 | 1.796606  | -5.226103 |   |
| 2.075894 |   |           |           |   |
| 86       | 1 | 0.676720  | -4.857172 |   |
| 3.296324 |   |           |           |   |
| 87       | 1 | -0.527598 | -3.254006 | - |
| 1.355164 |   |           |           |   |

-----  
 HF = -2103.7774998 Hartree  
 Zero-point correction = 0.731427  
 Sum of electronic and thermal Enthalpies = -2103.001841  
 Sum of electronic and thermal Free Energies = -2103.119661

$(\lambda\lambda) - [\text{Pr}(\text{L})]^{3+}$  (0 imaginary frequencies)

| Center<br>Number | Atomic<br>Number | Coordinates (Angstroms) |          |   |
|------------------|------------------|-------------------------|----------|---|
|                  |                  | X                       | Y        | Z |
| 1                | 59               | -0.000265               | 0.000000 | - |

|          |   |           |           |   |
|----------|---|-----------|-----------|---|
| 0.000021 |   |           |           |   |
| 2        | 7 | -0.000460 | -2.640067 |   |
| 0.001882 |   |           |           |   |
| 3        | 7 | 0.896898  | -1.192489 |   |
| 2.274356 |   |           |           |   |
| 4        | 7 | -0.896906 | 1.195870  |   |
| 2.272557 |   |           |           |   |
| 5        | 7 | 0.000840  | 2.640068  | - |
| 0.001896 |   |           |           |   |
| 6        | 7 | 0.897507  | 1.192047  | - |
| 2.274390 |   |           |           |   |
| 7        | 7 | -0.897563 | -1.195427 | - |
| 2.272574 |   |           |           |   |
| 8        | 8 | 2.233214  | 0.840098  |   |
| 1.090607 |   |           |           |   |
| 9        | 8 | -2.233599 | -0.838166 |   |
| 1.092079 |   |           |           |   |
| 10       | 8 | 2.232862  | -0.841134 | - |
| 1.090596 |   |           |           |   |
| 11       | 8 | -2.233280 | 0.839188  | - |
| 1.092008 |   |           |           |   |
| 12       | 6 | -0.153196 | -3.327280 | - |
| 1.159272 |   |           |           |   |
| 13       | 6 | -0.175509 | -4.720997 | - |
| 1.187581 |   |           |           |   |
| 14       | 1 | -0.316314 | -5.244544 | - |
| 2.124748 |   |           |           |   |
| 15       | 6 | -0.000667 | -5.426456 |   |
| 0.003749 |   |           |           |   |
| 16       | 1 | -0.000756 | -6.509430 |   |
| 0.004474 |   |           |           |   |
| 17       | 6 | 0.174306  | -4.719428 |   |
| 1.194120 |   |           |           |   |
| 18       | 1 | 0.315053  | -5.241734 |   |
| 2.131987 |   |           |           |   |
| 19       | 6 | 0.152203  | -3.325741 |   |
| 1.163936 |   |           |           |   |
| 20       | 6 | 0.212720  | -2.522920 |   |
| 2.447116 |   |           |           |   |
| 21       | 1 | -0.815884 | -2.307966 |   |
| 2.753697 |   |           |           |   |
| 22       | 1 | 0.696845  | -3.110980 |   |
| 3.238567 |   |           |           |   |
| 23       | 6 | 0.680382  | -0.340558 |   |
| 3.510835 |   |           |           |   |
| 24       | 1 | 1.471020  | 0.410710  |   |
| 3.541560 |   |           |           |   |
| 25       | 1 | 0.780706  | -0.955791 |   |
| 4.416413 |   |           |           |   |
| 26       | 6 | -0.680723 | 0.345497  |   |
| 3.510166 |   |           |           |   |
| 27       | 1 | -1.471280 | -0.405824 |   |
| 3.541485 |   |           |           |   |
| 28       | 1 | -0.781454 | 0.961842  |   |
| 4.414944 |   |           |           |   |
| 29       | 6 | -0.212278 | 2.526294  |   |
| 2.443531 |   |           |           |   |
| 30       | 1 | 0.816229  | 2.311404  |   |
| 2.750451 |   |           |           |   |
| 31       | 1 | -0.696248 | 3.115610  |   |
| 3.234145 |   |           |           |   |
| 32       | 6 | -0.151407 | 3.327358  |   |
| 1.159266 |   |           |           |   |

|          |   |           |           |   |
|----------|---|-----------|-----------|---|
| 33       | 6 | -0.172751 | 4.721095  |   |
| 1.187605 |   |           |           |   |
| 34       | 1 | -0.313190 | 5.244717  |   |
| 2.124783 |   |           |           |   |
| 35       | 6 | 0.002574  | 5.426456  | - |
| 0.003706 |   |           |           |   |
| 36       | 1 | 0.003237  | 6.509430  | - |
| 0.004408 |   |           |           |   |
| 37       | 6 | 0.177043  | 4.719330  | - |
| 1.194100 |   |           |           |   |
| 38       | 1 | 0.318138  | 5.241561  | - |
| 2.131957 |   |           |           |   |
| 39       | 6 | 0.153971  | 3.325664  | - |
| 1.163946 |   |           |           |   |
| 40       | 6 | 0.213939  | 2.522800  | - |
| 2.447119 |   |           |           |   |
| 41       | 1 | -0.814802 | 2.308322  | - |
| 2.753573 |   |           |           |   |
| 42       | 1 | 0.698250  | 3.110606  | - |
| 3.238644 |   |           |           |   |
| 43       | 6 | 0.680531  | 0.340199  | - |
| 3.510844 |   |           |           |   |
| 44       | 1 | 1.470769  | -0.411491 | - |
| 3.541542 |   |           |           |   |
| 45       | 1 | 0.781181  | 0.955352  | - |
| 4.416439 |   |           |           |   |
| 46       | 6 | -0.680946 | -0.345136 | - |
| 3.510160 |   |           |           |   |
| 47       | 1 | -1.471104 | 0.406608  | - |
| 3.541434 |   |           |           |   |
| 48       | 1 | -0.782025 | -0.961399 | - |
| 4.414955 |   |           |           |   |
| 49       | 6 | -0.213546 | -2.526173 | - |
| 2.443530 |   |           |           |   |
| 50       | 1 | 0.815093  | -2.311757 | - |
| 2.750336 |   |           |           |   |
| 51       | 1 | -0.697714 | -3.115237 | - |
| 3.234208 |   |           |           |   |
| 52       | 6 | 2.378037  | -1.374043 |   |
| 2.089715 |   |           |           |   |
| 53       | 1 | 2.544429  | -2.060535 |   |
| 1.251984 |   |           |           |   |
| 54       | 1 | 2.878859  | -1.769546 |   |
| 2.977202 |   |           |           |   |
| 55       | 6 | 2.949245  | -0.014106 |   |
| 1.715781 |   |           |           |   |
| 56       | 6 | -2.377971 | 1.377624  |   |
| 2.087693 |   |           |           |   |
| 57       | 1 | -2.544240 | 2.063182  |   |
| 1.249172 |   |           |           |   |
| 58       | 1 | -2.878665 | 1.774354  |   |
| 2.974715 |   |           |           |   |
| 59       | 6 | -2.949602 | 0.017367  |   |
| 1.715493 |   |           |           |   |
| 60       | 6 | 2.378735  | 1.372892  | - |
| 2.089820 |   |           |           |   |
| 61       | 1 | 2.545497  | 2.059384  | - |
| 1.252162 |   |           |           |   |
| 62       | 1 | 2.879723  | 1.768077  | - |
| 2.977356 |   |           |           |   |
| 63       | 6 | 2.949301  | 0.012710  | - |
| 1.715794 |   |           |           |   |
| 64       | 6 | -2.378716 | -1.376476 | - |

|          |   |           |           |   |  |
|----------|---|-----------|-----------|---|--|
| 2.087752 |   |           |           |   |  |
| 65       | 1 | -2.545335 | -2.062033 | - |  |
| 1.249300 |   |           |           |   |  |
| 66       | 1 | -2.879591 | -1.772887 | - |  |
| 2.974814 |   |           |           |   |  |
| 67       | 6 | -2.949694 | -0.015976 | - |  |
| 1.715456 |   |           |           |   |  |
| 68       | 7 | 4.214812  | -0.259951 | - |  |
| 2.063817 |   |           |           |   |  |
| 69       | 7 | 4.976931  | 0.696058  | - |  |
| 2.816023 |   |           |           |   |  |
| 70       | 1 | 5.268656  | 0.296978  | - |  |
| 3.713937 |   |           |           |   |  |
| 71       | 1 | 5.774203  | 1.036595  | - |  |
| 2.270733 |   |           |           |   |  |
| 72       | 7 | 4.214869  | 0.257957  |   |  |
| 2.063861 |   |           |           |   |  |
| 73       | 7 | -4.215558 | -0.253536 |   |  |
| 2.063238 |   |           |           |   |  |
| 74       | 1 | -4.595394 | -1.178173 |   |  |
| 1.836992 |   |           |           |   |  |
| 75       | 7 | -4.977082 | 0.704377  |   |  |
| 2.813634 |   |           |           |   |  |
| 76       | 1 | -5.773801 | 1.044827  |   |  |
| 2.267481 |   |           |           |   |  |
| 77       | 1 | -5.269570 | 0.306969  |   |  |
| 3.712045 |   |           |           |   |  |
| 78       | 7 | -4.215536 | 0.255533  | - |  |
| 2.063141 |   |           |           |   |  |
| 79       | 1 | -4.594935 | 1.180334  | - |  |
| 1.836834 |   |           |           |   |  |
| 80       | 7 | -4.977521 | -0.701976 | - |  |
| 2.813584 |   |           |           |   |  |
| 81       | 1 | -5.774377 | -1.042104 | - |  |
| 2.267433 |   |           |           |   |  |
| 82       | 1 | -5.269853 | -0.304368 | - |  |
| 3.711958 |   |           |           |   |  |
| 83       | 1 | 4.593935  | -1.184543 | - |  |
| 1.836200 |   |           |           |   |  |
| 84       | 7 | 4.976534  | -0.698448 |   |  |
| 2.816025 |   |           |           |   |  |
| 85       | 1 | 5.268419  | -0.299558 |   |  |
| 3.713972 |   |           |           |   |  |
| 86       | 1 | 5.773664  | -1.039311 |   |  |
| 2.270733 |   |           |           |   |  |
| 87       | 1 | 4.594425  | 1.182384  |   |  |
| 1.836295 |   |           |           |   |  |

-----  
 HF = -2104.4403183 Hartree  
 Zero-point correction = 0.733095  
 Sum of electronic and thermal Enthalpies = -2103.664051  
 Sum of electronic and thermal Free Energies = -2103.778391

$(\lambda\delta) - [\text{Pr}(\text{L})]^{3+}$  (0 imaginary frequencies)

| Center<br>Number | Atomic<br>Number | Coordinates (Angstroms) |           |   |
|------------------|------------------|-------------------------|-----------|---|
|                  |                  | X                       | Y         | Z |
| 1                | 59               | -0.000163               | -0.004581 | - |
| 0.061422         |                  |                         |           |   |
| 2                | 6                | -3.092021               | -1.590516 |   |



|          |   |           |           |   |
|----------|---|-----------|-----------|---|
| 0.917424 |   |           |           |   |
| 3        | 6 | -4.398815 | -2.067659 |   |
| 0.864207 |   |           |           |   |
| 4        | 6 | -4.946048 | -2.418518 | - |
| 0.371185 |   |           |           |   |
| 5        | 6 | -4.164711 | -2.274388 | - |
| 1.513725 |   |           |           |   |
| 6        | 6 | -2.877162 | -1.745644 | - |
| 1.398043 |   |           |           |   |
| 7        | 6 | -2.074186 | -1.481670 | - |
| 2.648252 |   |           |           |   |
| 8        | 6 | 0.059367  | -0.806336 | - |
| 3.632599 |   |           |           |   |
| 9        | 6 | -0.099137 | 0.712097  | - |
| 3.651489 |   |           |           |   |
| 10       | 6 | 2.041058  | 1.418112  | - |
| 2.703818 |   |           |           |   |
| 11       | 6 | 2.852951  | 1.719989  | - |
| 1.468075 |   |           |           |   |
| 12       | 6 | 4.137290  | 2.250720  | - |
| 1.608414 |   |           |           |   |
| 13       | 6 | 4.926481  | 2.429940  | - |
| 0.476335 |   |           |           |   |
| 14       | 6 | 4.390499  | 2.110212  | - |
| 0.772423 |   |           |           |   |
| 15       | 6 | 3.086520  | 1.628642  | - |
| 0.849118 |   |           |           |   |
| 16       | 6 | 2.410665  | 1.476551  | - |
| 2.185106 |   |           |           |   |
| 17       | 6 | 0.653015  | 0.458797  | - |
| 3.512315 |   |           |           |   |
| 18       | 6 | -0.620280 | -0.382386 | - |
| 3.525619 |   |           |           |   |
| 19       | 6 | -2.403232 | -1.410908 | - |
| 2.243174 |   |           |           |   |
| 20       | 6 | -0.016590 | -2.768154 | - |
| 2.150956 |   |           |           |   |
| 21       | 6 | 2.328503  | -0.986168 | - |
| 2.365038 |   |           |           |   |
| 22       | 6 | -2.296785 | 1.052926  | - |
| 2.366870 |   |           |           |   |
| 23       | 7 | -2.340026 | -1.402057 | - |
| 0.202043 |   |           |           |   |
| 24       | 7 | -0.594168 | -1.409343 | - |
| 2.408972 |   |           |           |   |
| 25       | 7 | 0.563721  | 1.346181  | - |
| 2.448782 |   |           |           |   |
| 26       | 7 | 2.326146  | 1.407911  | - |
| 0.258923 |   |           |           |   |
| 27       | 7 | 1.507297  | 0.268418  | - |
| 2.276127 |   |           |           |   |
| 28       | 7 | -1.486940 | -0.210505 | - |
| 2.296013 |   |           |           |   |
| 29       | 1 | -4.970219 | -2.187327 | - |
| 1.775841 |   |           |           |   |
| 30       | 1 | -5.954500 | -2.807476 | - |
| 0.437166 |   |           |           |   |
| 31       | 1 | -4.547765 | -2.558118 | - |
| 2.486052 |   |           |           |   |
| 32       | 1 | -2.379853 | -0.504954 | - |
| 3.034738 |   |           |           |   |
| 33       | 1 | -2.310678 | -2.234971 | - |
| 3.413752 |   |           |           |   |

|          |   |           |           |   |
|----------|---|-----------|-----------|---|
| 34       | 1 | 1.117104  | -1.073523 | - |
| 3.616969 |   |           |           |   |
| 35       | 1 | -0.375344 | -1.234336 | - |
| 4.547709 |   |           |           |   |
| 36       | 1 | 0.328790  | 1.116404  | - |
| 4.580467 |   |           |           |   |
| 37       | 1 | -1.156679 | 0.980042  | - |
| 3.634995 |   |           |           |   |
| 38       | 1 | 2.267234  | 2.151481  | - |
| 3.491490 |   |           |           |   |
| 39       | 1 | 2.347670  | 0.432509  | - |
| 3.066487 |   |           |           |   |
| 40       | 1 | 4.511750  | 2.508656  | - |
| 2.591218 |   |           |           |   |
| 41       | 1 | 5.932677  | 2.821165  | - |
| 0.560779 |   |           |           |   |
| 42       | 1 | 4.968828  | 2.256525  |   |
| 1.675773 |   |           |           |   |
| 43       | 1 | 1.757609  | 2.345335  |   |
| 2.310797 |   |           |           |   |
| 44       | 1 | 3.154240  | 1.472822  |   |
| 2.992846 |   |           |           |   |
| 45       | 1 | 0.402500  | 1.518151  |   |
| 3.570312 |   |           |           |   |
| 46       | 1 | 1.237464  | 0.218472  |   |
| 4.413772 |   |           |           |   |
| 47       | 1 | -1.195114 | -0.128522 |   |
| 4.429598 |   |           |           |   |
| 48       | 1 | -0.368999 | -1.440644 |   |
| 3.595883 |   |           |           |   |
| 49       | 1 | -3.139693 | -1.378922 |   |
| 3.056817 |   |           |           |   |
| 50       | 1 | -1.757978 | -2.282868 |   |
| 2.386262 |   |           |           |   |
| 51       | 1 | -0.066442 | -3.414174 | - |
| 3.039551 |   |           |           |   |
| 52       | 1 | 2.829346  | -1.070671 |   |
| 3.339835 |   |           |           |   |
| 53       | 1 | 3.094270  | -0.937506 |   |
| 1.579925 |   |           |           |   |
| 54       | 1 | -2.787346 | 1.161818  |   |
| 3.344412 |   |           |           |   |
| 55       | 1 | -3.070104 | 0.993632  |   |
| 1.590000 |   |           |           |   |
| 56       | 6 | 1.454001  | -2.205452 |   |
| 2.063712 |   |           |           |   |
| 57       | 6 | 1.425381  | -2.583336 | - |
| 1.661145 |   |           |           |   |
| 58       | 6 | -1.414937 | 2.256950  |   |
| 2.030771 |   |           |           |   |
| 59       | 6 | -0.015543 | 2.709138  | - |
| 2.217453 |   |           |           |   |
| 60       | 1 | 0.021977  | 3.333162  | - |
| 3.122209 |   |           |           |   |
| 61       | 1 | 0.566729  | 3.200349  | - |
| 1.428312 |   |           |           |   |
| 62       | 6 | -1.450855 | 2.533039  | - |
| 1.705698 |   |           |           |   |
| 63       | 8 | 0.499395  | -2.108222 |   |
| 1.238550 |   |           |           |   |
| 64       | 8 | 1.762703  | -1.498358 | - |
| 1.097576 |   |           |           |   |
| 65       | 8 | -1.779471 | 1.460769  | - |

|          |   |           |           |   |
|----------|---|-----------|-----------|---|
| 1.113659 |   |           |           |   |
| 66       | 8 | -0.483655 | 2.138131  |   |
| 1.182340 |   |           |           |   |
| 67       | 7 | -1.708162 | 3.397790  |   |
| 2.674561 |   |           |           |   |
| 68       | 1 | -2.469002 | 3.418984  |   |
| 3.358206 |   |           |           |   |
| 69       | 7 | -0.965676 | 4.586417  |   |
| 2.378194 |   |           |           |   |
| 70       | 1 | -1.580360 | 5.302213  |   |
| 1.980047 |   |           |           |   |
| 71       | 1 | -0.482464 | 4.921824  |   |
| 3.216939 |   |           |           |   |
| 72       | 7 | -2.284136 | 3.557688  | - |
| 1.924864 |   |           |           |   |
| 73       | 1 | -1.982606 | 4.354304  | - |
| 2.490926 |   |           |           |   |
| 74       | 7 | -3.604145 | 3.528278  | - |
| 1.360966 |   |           |           |   |
| 75       | 1 | -3.792666 | 4.414183  | - |
| 0.883338 |   |           |           |   |
| 76       | 1 | -4.298283 | 3.336848  | - |
| 2.091080 |   |           |           |   |
| 77       | 7 | 2.254725  | -3.613375 | - |
| 1.868806 |   |           |           |   |
| 78       | 1 | 1.944135  | -4.422816 | - |
| 2.411314 |   |           |           |   |
| 79       | 7 | 3.582680  | -3.572504 | - |
| 1.324749 |   |           |           |   |
| 80       | 1 | 3.777014  | -4.446972 | - |
| 0.828757 |   |           |           |   |
| 81       | 1 | 4.266384  | -3.399804 | - |
| 2.069236 |   |           |           |   |
| 82       | 7 | 1.779672  | -3.334956 | - |
| 2.711401 |   |           |           |   |
| 83       | 1 | 2.553037  | -3.336376 | - |
| 3.381154 |   |           |           |   |
| 84       | 7 | 1.053618  | -4.539521 | - |
| 2.439276 |   |           |           |   |
| 85       | 1 | 1.680208  | -5.255558 | - |
| 2.060771 |   |           |           |   |
| 86       | 1 | 0.571141  | -4.862370 | - |
| 3.283454 |   |           |           |   |
| 87       | 1 | -0.590982 | -3.238061 | - |
| 1.343248 |   |           |           |   |

-----  
 HF = -2104.4123342 Hartree  
 Zero-point correction = 0.731577  
 Sum of electronic and thermal Enthalpies = -2103.636548  
 Sum of electronic and thermal Free Energies = -2103.754351

( $\lambda\lambda$ ) - [Eu(L)]<sup>3+</sup> (0 imaginary frequencies)

| Center<br>Number | Atomic<br>Number | Coordinates (Angstroms) |          |   |
|------------------|------------------|-------------------------|----------|---|
|                  |                  | X                       | Y        | Z |
| 1                | 63               | 0.000000                | 0.000000 |   |
| 0.000007         |                  |                         |          |   |
| 2                | 7                | 0.000004                | 2.607710 | - |
| 0.000021         |                  |                         |          |   |

|          |   |           |           |   |
|----------|---|-----------|-----------|---|
| 3        | 7 | -0.909416 | 1.162872  |   |
| 2.252291 |   |           |           |   |
| 4        | 7 | 0.909397  | -1.162848 |   |
| 2.252327 |   |           |           |   |
| 5        | 7 | -0.000007 | -2.607710 |   |
| 0.000028 |   |           |           |   |
| 6        | 7 | -0.909357 | -1.162873 | - |
| 2.252310 |   |           |           |   |
| 7        | 7 | 0.909422  | 1.162849  | - |
| 2.252311 |   |           |           |   |
| 8        | 8 | -2.171149 | -0.879102 |   |
| 1.040191 |   |           |           |   |
| 9        | 8 | 2.171137  | 0.879139  |   |
| 1.040182 |   |           |           |   |
| 10       | 8 | -2.171142 | 0.879089  | - |
| 1.040203 |   |           |           |   |
| 11       | 8 | 2.171150  | -0.879125 | - |
| 1.040156 |   |           |           |   |
| 12       | 6 | 0.174698  | 3.299384  | - |
| 1.155645 |   |           |           |   |
| 13       | 6 | 0.198840  | 4.693111  | - |
| 1.185049 |   |           |           |   |
| 14       | 1 | 0.359087  | 5.213862  | - |
| 2.120697 |   |           |           |   |
| 15       | 6 | -0.000038 | 5.401345  | - |
| 0.000040 |   |           |           |   |
| 16       | 1 | -0.000057 | 6.484279  | - |
| 0.000048 |   |           |           |   |
| 17       | 6 | -0.198890 | 4.693121  |   |
| 1.184982 |   |           |           |   |
| 18       | 1 | -0.359146 | 5.213880  |   |
| 2.120623 |   |           |           |   |
| 19       | 6 | -0.174704 | 3.299396  |   |
| 1.155597 |   |           |           |   |
| 20       | 6 | -0.258290 | 2.506125  |   |
| 2.439370 |   |           |           |   |
| 21       | 1 | 0.763508  | 2.315592  |   |
| 2.782368 |   |           |           |   |
| 22       | 1 | -0.779240 | 3.087510  |   |
| 3.212300 |   |           |           |   |
| 23       | 6 | -0.687801 | 0.324837  |   |
| 3.497032 |   |           |           |   |
| 24       | 1 | -1.461242 | -0.444567 |   |
| 3.528598 |   |           |           |   |
| 25       | 1 | -0.808630 | 0.944310  |   |
| 4.397090 |   |           |           |   |
| 26       | 6 | 0.687774  | -0.324790 |   |
| 3.497051 |   |           |           |   |
| 27       | 1 | 1.461224  | 0.444605  |   |
| 3.528621 |   |           |           |   |
| 28       | 1 | 0.808577  | -0.944250 |   |
| 4.397122 |   |           |           |   |
| 29       | 6 | 0.258263  | -2.506095 |   |
| 2.439424 |   |           |           |   |
| 30       | 1 | -0.763530 | -2.315551 |   |
| 2.782430 |   |           |           |   |
| 31       | 1 | 0.779213  | -3.087475 |   |
| 3.212358 |   |           |           |   |
| 32       | 6 | 0.174683  | -3.299383 |   |
| 1.155656 |   |           |           |   |
| 33       | 6 | 0.198840  | -4.693108 |   |
| 1.185060 |   |           |           |   |
| 34       | 1 | 0.359084  | -5.213858 |   |

|          |   |           |           |   |
|----------|---|-----------|-----------|---|
| 2.120709 |   |           |           |   |
| 35       | 6 | -0.000017 | -5.401345 |   |
| 0.000048 |   |           |           |   |
| 36       | 1 | -0.000024 | -6.484279 |   |
| 0.000057 |   |           |           |   |
| 37       | 6 | -0.198865 | -4.693124 | - |
| 1.184975 |   |           |           |   |
| 38       | 1 | -0.359108 | -5.213884 | - |
| 2.120618 |   |           |           |   |
| 39       | 6 | -0.174695 | -3.299397 | - |
| 1.155590 |   |           |           |   |
| 40       | 6 | -0.258218 | -2.506120 | - |
| 2.439383 |   |           |           |   |
| 41       | 1 | 0.763582  | -2.315577 | - |
| 2.782372 |   |           |           |   |
| 42       | 1 | -0.779154 | -3.087509 | - |
| 3.212320 |   |           |           |   |
| 43       | 6 | -0.687732 | -0.324833 | - |
| 3.497045 |   |           |           |   |
| 44       | 1 | -1.461181 | 0.444560  | - |
| 3.528625 |   |           |           |   |
| 45       | 1 | -0.808534 | -0.944306 | - |
| 4.397107 |   |           |           |   |
| 46       | 6 | 0.687816  | 0.324795  | - |
| 3.497041 |   |           |           |   |
| 47       | 1 | 1.461267  | -0.444599 | - |
| 3.528603 |   |           |           |   |
| 48       | 1 | 0.808631  | 0.944256  | - |
| 4.397109 |   |           |           |   |
| 49       | 6 | 0.258297  | 2.506098  | - |
| 2.439416 |   |           |           |   |
| 50       | 1 | -0.763490 | 2.315558  | - |
| 2.782445 |   |           |           |   |
| 51       | 1 | 0.779264  | 3.087479  | - |
| 3.212338 |   |           |           |   |
| 52       | 6 | -2.393464 | 1.313055  |   |
| 2.060070 |   |           |           |   |
| 53       | 1 | -2.568787 | 1.995630  |   |
| 1.221777 |   |           |           |   |
| 54       | 1 | -2.908209 | 1.691581  |   |
| 2.946789 |   |           |           |   |
| 55       | 6 | -2.918339 | -0.061594 |   |
| 1.680055 |   |           |           |   |
| 56       | 6 | 2.393446  | -1.313038 |   |
| 2.060120 |   |           |           |   |
| 57       | 1 | 2.568774  | -1.995622 |   |
| 1.221837 |   |           |           |   |
| 58       | 1 | 2.908185  | -1.691545 |   |
| 2.946851 |   |           |           |   |
| 59       | 6 | 2.918337  | 0.061650  |   |
| 1.680060 |   |           |           |   |
| 60       | 6 | -2.393407 | -1.313072 | - |
| 2.060110 |   |           |           |   |
| 61       | 1 | -2.568736 | -1.995640 | - |
| 1.221813 |   |           |           |   |
| 62       | 1 | -2.908136 | -1.691607 | - |
| 2.946835 |   |           |           |   |
| 63       | 6 | -2.918318 | 0.061581  | - |
| 1.680084 |   |           |           |   |
| 64       | 6 | 2.393468  | 1.313034  | - |
| 2.060079 |   |           |           |   |
| 65       | 1 | 2.568784  | 1.995604  | - |
| 1.221781 |   |           |           |   |

|          |   |           |           |   |
|----------|---|-----------|-----------|---|
| 66       | 1 | 2.908223  | 1.691552  | - |
| 2.946796 |   |           |           |   |
| 67       | 6 | 2.918343  | -0.061638 | - |
| 1.680042 |   |           |           |   |
| 68       | 7 | -4.167014 | 0.391216  | - |
| 2.036915 |   |           |           |   |
| 69       | 7 | -4.960747 | -0.524153 | - |
| 2.807260 |   |           |           |   |
| 70       | 1 | -5.225473 | -0.103742 | - |
| 3.703865 |   |           |           |   |
| 71       | 1 | -5.777962 | -0.835639 | - |
| 2.274154 |   |           |           |   |
| 72       | 7 | -4.167044 | -0.391227 | - |
| 2.036853 |   |           |           |   |
| 73       | 7 | 4.167021  | 0.391307  | - |
| 2.036900 |   |           |           |   |
| 74       | 1 | 4.510061  | 1.328460  | - |
| 1.802665 |   |           |           |   |
| 75       | 7 | 4.960734  | -0.524047 | - |
| 2.807286 |   |           |           |   |
| 76       | 1 | 5.777968  | -0.835536 | - |
| 2.274212 |   |           |           |   |
| 77       | 1 | 5.225423  | -0.103622 | - |
| 3.703896 |   |           |           |   |
| 78       | 7 | 4.167029  | -0.391294 | - |
| 2.036880 |   |           |           |   |
| 79       | 1 | 4.510070  | -1.328446 | - |
| 1.802639 |   |           |           |   |
| 80       | 7 | 4.960751  | 0.524060  | - |
| 2.807257 |   |           |           |   |
| 81       | 1 | 5.777979  | 0.835548  | - |
| 2.274174 |   |           |           |   |
| 82       | 1 | 5.225450  | 0.103635  | - |
| 3.703863 |   |           |           |   |
| 83       | 1 | -4.510068 | 1.328361  | - |
| 1.802663 |   |           |           |   |
| 84       | 7 | -4.960793 | 0.524143  | - |
| 2.807183 |   |           |           |   |
| 85       | 1 | -5.225538 | 0.103728  | - |
| 3.703781 |   |           |           |   |
| 86       | 1 | -5.777994 | 0.835632  | - |
| 2.274061 |   |           |           |   |
| 87       | 1 | -4.510094 | -1.328371 | - |
| 1.802594 |   |           |           |   |

-----  
 HF = -2106.8825813 Hartree  
 Zero-point correction = 0.733228  
 Sum of electronic and thermal Enthalpies = -2106.106231  
 Sum of electronic and thermal Free Energies = -2106.220318

$(\lambda\delta) - [\text{Eu(L)}]^{3+}$  (0 imaginary frequencies)

| Center<br>Number | Atomic<br>Number | Coordinates (Angstroms) |           |   |
|------------------|------------------|-------------------------|-----------|---|
|                  |                  | X                       | Y         | Z |
| 1                | 63               | -0.000380               | -0.000263 | - |
| 0.075908         |                  |                         |           |   |
| 2                | 6                | 3.283332                | 1.090299  | - |
| 0.829325         |                  |                         |           |   |
| 3                | 6                | 4.649451                | 1.344295  | - |
| 0.746959         |                  |                         |           |   |

|          |   |           |           |   |
|----------|---|-----------|-----------|---|
| 4        | 6 | 5.214424  | 1.639616  | - |
| 0.494632 |   |           |           |   |
| 5        | 6 | 4.387041  | 1.662329  | - |
| 1.612006 |   |           |           |   |
| 6        | 6 | 3.033387  | 1.347964  | - |
| 1.467318 |   |           |           |   |
| 7        | 6 | 2.174546  | 1.260245  | - |
| 2.702183 |   |           |           |   |
| 8        | 6 | -0.022980 | 0.756876  | - |
| 3.626307 |   |           |           |   |
| 9        | 6 | 0.018385  | -0.769585 | - |
| 3.623986 |   |           |           |   |
| 10       | 6 | -2.177978 | -1.270608 | - |
| 2.696022 |   |           |           |   |
| 11       | 6 | -3.035812 | -1.352841 | - |
| 1.460070 |   |           |           |   |
| 12       | 6 | -4.389873 | -1.666548 | - |
| 1.602574 |   |           |           |   |
| 13       | 6 | -5.216456 | -1.638694 | - |
| 0.484748 |   |           |           |   |
| 14       | 6 | -4.650323 | -1.339060 | - |
| 0.755296 |   |           |           |   |
| 15       | 6 | -3.283927 | -1.086035 | - |
| 0.835705 |   |           |           |   |
| 16       | 6 | -2.615594 | -0.989650 | - |
| 2.177116 |   |           |           |   |
| 17       | 6 | -0.702396 | -0.288400 | - |
| 3.480192 |   |           |           |   |
| 18       | 6 | 0.704855  | 0.299308  | - |
| 3.478871 |   |           |           |   |
| 19       | 6 | 2.616067  | 0.998195  | - |
| 2.171565 |   |           |           |   |
| 20       | 6 | 0.258719  | 2.711042  | - |
| 2.149621 |   |           |           |   |
| 21       | 6 | -2.069329 | 1.416283  | - |
| 2.281026 |   |           |           |   |
| 22       | 6 | 2.071805  | -1.407867 | - |
| 2.283488 |   |           |           |   |
| 23       | 7 | 2.476207  | 1.060714  | - |
| 0.267323 |   |           |           |   |
| 24       | 7 | 0.701855  | 1.304874  | - |
| 2.417608 |   |           |           |   |
| 25       | 7 | -0.705018 | -1.313738 | - |
| 2.412674 |   |           |           |   |
| 26       | 7 | -2.477517 | -1.061434 | - |
| 0.261615 |   |           |           |   |
| 27       | 7 | -1.499137 | 0.025355  | - |
| 2.230928 |   |           |           |   |
| 28       | 7 | 1.500515  | -0.017604 | - |
| 2.229760 |   |           |           |   |
| 29       | 1 | 5.256293  | 1.338307  | - |
| 1.643405 |   |           |           |   |
| 30       | 1 | 6.271047  | 1.859022  | - |
| 0.583202 |   |           |           |   |
| 31       | 1 | 4.782079  | 1.910551  | - |
| 2.589395 |   |           |           |   |
| 32       | 1 | 2.380735  | 0.298696  | - |
| 3.181489 |   |           |           |   |
| 33       | 1 | 2.456659  | 2.048894  | - |
| 3.415268 |   |           |           |   |
| 34       | 1 | -1.056018 | 1.106359  | - |
| 3.590749 |   |           |           |   |
| 35       | 1 | 0.427104  | 1.144107  | - |

|                |   |           |           |   |
|----------------|---|-----------|-----------|---|
| 4.551706<br>36 | 1 | -0.432876 | -1.159616 | - |
| 4.547633<br>37 | 1 | 1.051430  | -1.119055 | - |
| 3.588711<br>38 | 1 | -2.460611 | -2.062493 | - |
| 3.405313<br>39 | 1 | -2.384764 | -0.311269 | - |
| 3.179510<br>40 | 1 | -4.785806 | -1.918235 | - |
| 2.578716<br>41 | 1 | -6.273341 | -1.857471 | - |
| 0.571720<br>42 | 1 | -5.256519 | -1.329082 | - |
| 1.652143<br>43 | 1 | -2.146617 | -1.960078 | - |
| 2.365896<br>44 | 1 | -3.357600 | -0.798872 | - |
| 2.963769<br>45 | 1 | -0.655062 | -1.374309 | - |
| 3.567795<br>46 | 1 | -1.236268 | 0.079915  | - |
| 4.369827<br>47 | 1 | 1.239451  | -0.066793 | - |
| 4.368983<br>48 | 1 | 0.657618  | 1.385426  | - |
| 3.563895<br>49 | 1 | 3.358849  | 0.810784  | - |
| 2.958301<br>50 | 1 | 2.146430  | 1.968917  | - |
| 2.357219<br>51 | 1 | 0.338420  | 3.347436  | - |
| 3.042882<br>52 | 1 | -2.574290 | 1.610589  | - |
| 3.237429<br>53 | 1 | -2.798456 | 1.503486  | - |
| 1.465370<br>54 | 1 | 2.577532  | -1.599076 | - |
| 3.240121<br>55 | 1 | 2.800602  | -1.496861 | - |
| 1.467708<br>56 | 6 | -0.959257 | 2.424454  | - |
| 1.994585<br>57 | 6 | -1.170067 | 2.666668  | - |
| 1.603608<br>58 | 6 | 0.962692  | -2.418091 | - |
| 2.000443<br>59 | 6 | -0.261078 | -2.718789 | - |
| 2.140251<br>60 | 1 | -0.341705 | -3.358391 | - |
| 3.031140<br>61 | 1 | -0.904642 | -3.127567 | - |
| 1.351526<br>62 | 6 | 1.168422  | -2.671925 | - |
| 1.596330<br>63 | 8 | -0.079648 | 2.150318  | - |
| 1.124591<br>64 | 8 | -1.591316 | 1.612196  | - |
| 1.034398<br>65 | 8 | 1.589802  | -1.615509 | - |
| 1.030815<br>66 | 8 | 0.080950  | -2.146470 | - |
| 1.131810       |   |           |           |   |



|          |   |           |           |   |
|----------|---|-----------|-----------|---|
| 67       | 7 | 0.999755  | -3.562284 |   |
| 2.700467 |   |           |           |   |
| 68       | 1 | 1.742494  | -3.718570 |   |
| 3.386541 |   |           |           |   |
| 69       | 7 | 0.000759  | -4.562509 |   |
| 2.467845 |   |           |           |   |
| 70       | 1 | 0.418938  | -5.400757 |   |
| 2.053721 |   |           |           |   |
| 71       | 1 | -0.498045 | -4.774003 |   |
| 3.337138 |   |           |           |   |
| 72       | 7 | 1.902012  | -3.780423 | - |
| 1.741697 |   |           |           |   |
| 73       | 1 | 1.553131  | -4.562419 | - |
| 2.300556 |   |           |           |   |
| 74       | 7 | 3.190240  | -3.859790 | - |
| 1.106554 |   |           |           |   |
| 75       | 1 | 3.289605  | -4.775614 | - |
| 0.658295 |   |           |           |   |
| 76       | 1 | 3.933314  | -3.697358 | - |
| 1.795209 |   |           |           |   |
| 77       | 7 | -1.903137 | 3.775238  | - |
| 1.751049 |   |           |           |   |
| 78       | 1 | -1.554710 | 4.555333  | - |
| 2.312838 |   |           |           |   |
| 79       | 7 | -3.190291 | 3.857271  | - |
| 1.114047 |   |           |           |   |
| 80       | 1 | -3.288480 | 4.774603  | - |
| 0.668618 |   |           |           |   |
| 81       | 1 | -3.934571 | 3.692948  | - |
| 1.800952 |   |           |           |   |
| 82       | 7 | -0.992807 | 3.569519  |   |
| 2.693395 |   |           |           |   |
| 83       | 1 | -1.734610 | 3.728612  |   |
| 3.379833 |   |           |           |   |
| 84       | 7 | 0.009026  | 4.566577  |   |
| 2.459203 |   |           |           |   |
| 85       | 1 | -0.406110 | 5.404122  |   |
| 2.040588 |   |           |           |   |
| 86       | 1 | 0.505998  | 4.780435  |   |
| 3.328962 |   |           |           |   |
| 87       | 1 | 0.903473  | 3.122377  | - |
| 1.363205 |   |           |           |   |

-----  
 HF = -2106.8537108 Hartree  
 Zero-point correction = 0.731930  
 Sum of electronic and thermal Enthalpies = -2106.077656  
 Sum of electronic and thermal Free Energies = -2106.195955

$(\lambda\lambda) - [\text{Tb(L)}]^{3+}$  (0 imaginary frequencies)

| Center<br>Number | Atomic<br>Number | Coordinates (Angstroms) |           |   |
|------------------|------------------|-------------------------|-----------|---|
|                  |                  | X                       | Y         | Z |
| 1                | 65               | 0.000469                | 0.000002  | - |
| 0.000091         |                  |                         |           |   |
| 2                | 7                | 0.000372                | 2.594377  |   |
| 0.000188         |                  |                         |           |   |
| 3                | 7                | -0.913201               | 1.151249  |   |
| 2.245874         |                  |                         |           |   |
| 4                | 7                | 0.913219                | -1.151654 |   |

|          |   |           |           |   |  |
|----------|---|-----------|-----------|---|--|
| 2.245681 |   |           |           |   |  |
| 5        | 7 | -0.001088 | -2.594373 | - |  |
| 0.000250 |   |           |           |   |  |
| 6        | 7 | -0.913844 | -1.150709 | - |  |
| 2.245914 |   |           |           |   |  |
| 7        | 7 | 0.913998  | 1.151123  | - |  |
| 2.245673 |   |           |           |   |  |
| 8        | 8 | -2.142867 | -0.891735 |   |  |
| 1.020186 |   |           |           |   |  |
| 9        | 8 | 2.142741  | 0.891696  |   |  |
| 1.020638 |   |           |           |   |  |
| 10       | 8 | -2.142386 | 0.892946  | - |  |
| 1.020287 |   |           |           |   |  |
| 11       | 8 | 2.142302  | -0.892904 | - |  |
| 1.020641 |   |           |           |   |  |
| 12       | 6 | 0.183363  | 3.287973  | - |  |
| 1.152997 |   |           |           |   |  |
| 13       | 6 | 0.208775  | 4.681778  | - |  |
| 1.182320 |   |           |           |   |  |
| 14       | 1 | 0.376651  | 5.201762  | - |  |
| 2.117040 |   |           |           |   |  |
| 15       | 6 | 0.001176  | 5.390774  |   |  |
| 0.000353 |   |           |           |   |  |
| 16       | 1 | 0.001425  | 6.473685  |   |  |
| 0.000398 |   |           |           |   |  |
| 17       | 6 | -0.206726 | 4.681763  |   |  |
| 1.182946 |   |           |           |   |  |
| 18       | 1 | -0.374238 | 5.201710  |   |  |
| 2.117751 |   |           |           |   |  |
| 19       | 6 | -0.182058 | 3.287932  |   |  |
| 1.153456 |   |           |           |   |  |
| 20       | 6 | -0.274230 | 2.498560  |   |  |
| 2.437553 |   |           |           |   |  |
| 21       | 1 | 0.744542  | 2.317570  |   |  |
| 2.794745 |   |           |           |   |  |
| 22       | 1 | -0.808631 | 3.077970  |   |  |
| 3.202890 |   |           |           |   |  |
| 23       | 6 | -0.690185 | 0.318042  |   |  |
| 3.493061 |   |           |           |   |  |
| 24       | 1 | -1.457498 | -0.457783 |   |  |
| 3.524744 |   |           |           |   |  |
| 25       | 1 | -0.818371 | 0.938510  |   |  |
| 4.391428 |   |           |           |   |  |
| 26       | 6 | 0.690138  | -0.318648 |   |  |
| 3.493061 |   |           |           |   |  |
| 27       | 1 | 1.457465  | 0.457149  |   |  |
| 3.524971 |   |           |           |   |  |
| 28       | 1 | 0.818232  | -0.939341 |   |  |
| 4.391280 |   |           |           |   |  |
| 29       | 6 | 0.273923  | -2.498866 |   |  |
| 2.437126 |   |           |           |   |  |
| 30       | 1 | -0.744746 | -2.317661 |   |  |
| 2.794496 |   |           |           |   |  |
| 31       | 1 | 0.808246  | -3.078556 |   |  |
| 3.202304 |   |           |           |   |  |
| 32       | 6 | 0.181342  | -3.288073 |   |  |
| 1.152949 |   |           |           |   |  |
| 33       | 6 | 0.205699  | -4.681903 |   |  |
| 1.182303 |   |           |           |   |  |
| 34       | 1 | 0.373163  | -5.201988 |   |  |
| 2.117042 |   |           |           |   |  |
| 35       | 6 | -0.002404 | -5.390769 | - |  |
| 0.000351 |   |           |           |   |  |

|          |   |           |           |   |
|----------|---|-----------|-----------|---|
| 36       | 1 | -0.002969 | -6.473681 | - |
| 0.000372 |   |           |           |   |
| 37       | 6 | -0.209740 | -4.681628 | - |
| 1.182973 |   |           |           |   |
| 38       | 1 | -0.377614 | -5.201474 | - |
| 2.117769 |   |           |           |   |
| 39       | 6 | -0.184019 | -3.287822 | - |
| 1.153515 |   |           |           |   |
| 40       | 6 | -0.275601 | -2.498375 | - |
| 2.437599 |   |           |           |   |
| 41       | 1 | 0.743305  | -2.317932 | - |
| 2.794677 |   |           |           |   |
| 42       | 1 | -0.810252 | -3.077450 | - |
| 3.203011 |   |           |           |   |
| 43       | 6 | -0.690304 | -0.317612 | - |
| 3.493091 |   |           |           |   |
| 44       | 1 | -1.457147 | 0.458680  | - |
| 3.524778 |   |           |           |   |
| 45       | 1 | -0.818850 | -0.938000 | - |
| 4.391462 |   |           |           |   |
| 46       | 6 | 0.690441  | 0.318236  | - |
| 3.493060 |   |           |           |   |
| 47       | 1 | 1.457293  | -0.458031 | - |
| 3.524946 |   |           |           |   |
| 48       | 1 | 0.818938  | 0.938856  | - |
| 4.391272 |   |           |           |   |
| 49       | 6 | 0.275453  | 2.498698  | - |
| 2.437150 |   |           |           |   |
| 50       | 1 | -0.743332 | 2.318052  | - |
| 2.794465 |   |           |           |   |
| 51       | 1 | 0.810075  | 3.078052  | - |
| 3.202369 |   |           |           |   |
| 52       | 6 | -2.398015 | 1.289242  | - |
| 2.050573 |   |           |           |   |
| 53       | 1 | -2.576892 | 1.972015  | - |
| 1.213472 |   |           |           |   |
| 54       | 1 | -2.918407 | 1.659227  | - |
| 2.937565 |   |           |           |   |
| 55       | 6 | -2.903221 | -0.090695 | - |
| 1.666293 |   |           |           |   |
| 56       | 6 | 2.398040  | -1.289719 | - |
| 2.050442 |   |           |           |   |
| 57       | 1 | 2.576949  | -1.972562 | - |
| 1.213423 |   |           |           |   |
| 58       | 1 | 2.918458  | -1.659536 | - |
| 2.937484 |   |           |           |   |
| 59       | 6 | 2.903316  | 0.090298  | - |
| 1.666142 |   |           |           |   |
| 60       | 6 | -2.398744 | -1.287887 | - |
| 2.050713 |   |           |           |   |
| 61       | 1 | -2.578062 | -1.970666 | - |
| 1.213712 |   |           |           |   |
| 62       | 1 | -2.919285 | -1.657492 | - |
| 2.937776 |   |           |           |   |
| 63       | 6 | -2.903213 | 0.092291  | - |
| 1.666315 |   |           |           |   |
| 64       | 6 | 2.398896  | 1.288351  | - |
| 2.050456 |   |           |           |   |
| 65       | 1 | 2.578211  | 1.971197  | - |
| 1.213528 |   |           |           |   |
| 66       | 1 | 2.919515  | 1.657782  | - |
| 2.937543 |   |           |           |   |
| 67       | 6 | 2.903387  | -0.091895 | - |

|          |   |           |           |   |  |
|----------|---|-----------|-----------|---|--|
| 1.666033 |   |           |           |   |  |
| 68       | 7 | -4.144036 | 0.446936  | - |  |
| 2.025233 |   |           |           |   |  |
| 69       | 7 | -4.952319 | -0.450424 | - |  |
| 2.801932 |   |           |           |   |  |
| 70       | 1 | -5.206597 | -0.021074 | - |  |
| 3.697341 |   |           |           |   |  |
| 71       | 1 | -5.776869 | -0.748824 | - |  |
| 2.272569 |   |           |           |   |  |
| 72       | 7 | -4.144162 | -0.444744 |   |  |
| 2.025399 |   |           |           |   |  |
| 73       | 7 | 4.144274  | 0.444295  |   |  |
| 2.025135 |   |           |           |   |  |
| 74       | 1 | 4.471567  | 1.386144  |   |  |
| 1.786948 |   |           |           |   |  |
| 75       | 7 | 4.952101  | -0.453591 |   |  |
| 2.801829 |   |           |           |   |  |
| 76       | 1 | 5.776520  | -0.752249 |   |  |
| 2.272402 |   |           |           |   |  |
| 77       | 1 | 5.206579  | -0.024417 |   |  |
| 3.697269 |   |           |           |   |  |
| 78       | 7 | 4.144223  | -0.446512 | - |  |
| 2.024823 |   |           |           |   |  |
| 79       | 1 | 4.471016  | -1.388522 | - |  |
| 1.786589 |   |           |           |   |  |
| 80       | 7 | 4.952587  | 0.450965  | - |  |
| 2.801430 |   |           |           |   |  |
| 81       | 1 | 5.777075  | 0.749244  | - |  |
| 2.271897 |   |           |           |   |  |
| 82       | 1 | 5.206983  | 0.021646  | - |  |
| 3.696824 |   |           |           |   |  |
| 83       | 1 | -4.471103 | 1.388650  | - |  |
| 1.786206 |   |           |           |   |  |
| 84       | 7 | -4.951931 | 0.453008  |   |  |
| 2.802178 |   |           |           |   |  |
| 85       | 1 | -5.206291 | 0.023799  |   |  |
| 3.697631 |   |           |           |   |  |
| 86       | 1 | -5.776414 | 0.751771  |   |  |
| 2.272913 |   |           |           |   |  |
| 87       | 1 | -4.471705 | -1.386306 |   |  |
| 1.786421 |   |           |           |   |  |

-----  
 HF = -2108.0619341 Hartree

Zero-point correction = 0.733351

Sum of electronic and thermal Enthalpies = -2107.285522

Sum of electronic and thermal Free Energies = -2107.399376

$(\lambda\delta) - [\text{Tb(L)}]^{3+}$  (0 imaginary frequencies)

| Center Number | Atomic Number | Coordinates (Angstroms) |           |   |
|---------------|---------------|-------------------------|-----------|---|
|               |               | X                       | Y         | Z |
| 1             | 65            | -0.000476               | -0.000233 | - |
| 0.077759      |               |                         |           |   |
| 2             | 6             | 3.311203                | 0.981499  |   |
| 0.824583      |               |                         |           |   |
| 3             | 6             | 4.684961                | 1.190140  |   |
| 0.741762      |               |                         |           |   |
| 4             | 6             | 5.258914                | 1.467291  | - |
| 0.499687      |               |                         |           |   |

|          |   |           |           |   |
|----------|---|-----------|-----------|---|
| 5        | 6 | 4.431285  | 1.518108  | - |
| 1.615686 |   |           |           |   |
| 6        | 6 | 3.068213  | 1.247877  | - |
| 1.469665 |   |           |           |   |
| 7        | 6 | 2.206294  | 1.191033  | - |
| 2.702430 |   |           |           |   |
| 8        | 6 | -0.004281 | 0.755143  | - |
| 3.621035 |   |           |           |   |
| 9        | 6 | -0.000843 | -0.771326 | - |
| 3.618204 |   |           |           |   |
| 10       | 6 | -2.209957 | -1.204817 | - |
| 2.695282 |   |           |           |   |
| 11       | 6 | -3.070726 | -1.254736 | - |
| 1.461399 |   |           |           |   |
| 12       | 6 | -4.434157 | -1.524595 | - |
| 1.605016 |   |           |           |   |
| 13       | 6 | -5.260921 | -1.467360 | - |
| 0.488714 |   |           |           |   |
| 14       | 6 | -4.685792 | -1.184367 | - |
| 0.750891 |   |           |           |   |
| 15       | 6 | -3.311817 | -0.976504 | - |
| 0.831618 |   |           |           |   |
| 16       | 6 | -2.641573 | -0.901166 | - |
| 2.171670 |   |           |           |   |
| 17       | 6 | -0.711932 | -0.260532 | - |
| 3.474061 |   |           |           |   |
| 18       | 6 | 0.714028  | 0.276051  | - |
| 3.472530 |   |           |           |   |
| 19       | 6 | 2.642063  | 0.912118  | - |
| 2.165501 |   |           |           |   |
| 20       | 6 | 0.335818  | 2.694787  | - |
| 2.137313 |   |           |           |   |
| 21       | 6 | -2.012963 | 1.485782  | - |
| 2.263371 |   |           |           |   |
| 22       | 6 | 2.014975  | -1.474745 | - |
| 2.268500 |   |           |           |   |
| 23       | 7 | 2.501515  | 0.977434  | - |
| 0.270385 |   |           |           |   |
| 24       | 7 | 0.737222  | 1.277908  | - |
| 2.411729 |   |           |           |   |
| 25       | 7 | -0.740542 | -1.289406 | - |
| 2.405753 |   |           |           |   |
| 26       | 7 | -2.502903 | -0.978654 | - |
| 0.263961 |   |           |           |   |
| 27       | 7 | -1.492113 | 0.075552  | - |
| 2.220601 |   |           |           |   |
| 28       | 7 | 1.493255  | -0.065130 | - |
| 2.219934 |   |           |           |   |
| 29       | 1 | 5.291277  | 1.164076  | - |
| 1.638182 |   |           |           |   |
| 30       | 1 | 6.322089  | 1.651866  | - |
| 0.589047 |   |           |           |   |
| 31       | 1 | 4.832664  | 1.754388  | - |
| 2.593440 |   |           |           |   |
| 32       | 1 | 2.383130  | 0.226283  | - |
| 3.186871 |   |           |           |   |
| 33       | 1 | 2.509265  | 1.973999  | - |
| 3.413320 |   |           |           |   |
| 34       | 1 | -1.028060 | 1.130607  | - |
| 3.581747 |   |           |           |   |
| 35       | 1 | 0.453507  | 1.133779  | - |
| 4.546165 |   |           |           |   |
| 36       | 1 | -0.460154 | -1.153312 | - |

|          |   |           |           |   |  |
|----------|---|-----------|-----------|---|--|
| 4.541198 |   |           |           |   |  |
| 37       | 1 | 1.022932  | -1.146823 | - |  |
| 3.579269 |   |           |           |   |  |
| 38       | 1 | -2.513355 | -1.992036 | - |  |
| 3.401285 |   |           |           |   |  |
| 39       | 1 | -2.387708 | -0.242999 | - |  |
| 3.185229 |   |           |           |   |  |
| 40       | 1 | -4.836434 | -1.765556 | - |  |
| 2.581259 |   |           |           |   |  |
| 41       | 1 | -6.324315 | -1.651499 | - |  |
| 0.576343 |   |           |           |   |  |
| 42       | 1 | -5.291415 | -1.153284 |   |  |
| 1.647619 |   |           |           |   |  |
| 43       | 1 | -2.205352 | -1.886560 |   |  |
| 2.362120 |   |           |           |   |  |
| 44       | 1 | -3.375522 | -0.683664 |   |  |
| 2.958992 |   |           |           |   |  |
| 45       | 1 | -0.703935 | -1.347195 |   |  |
| 3.566644 |   |           |           |   |  |
| 46       | 1 | -1.235558 | 0.130360  |   |  |
| 4.360168 |   |           |           |   |  |
| 47       | 1 | 1.238222  | -0.111304 |   |  |
| 4.359850 |   |           |           |   |  |
| 48       | 1 | 0.706164  | 1.363060  |   |  |
| 3.560861 |   |           |           |   |  |
| 49       | 1 | 3.376854  | 0.698695  |   |  |
| 2.953167 |   |           |           |   |  |
| 50       | 1 | 2.205420  | 1.898166  |   |  |
| 2.351661 |   |           |           |   |  |
| 51       | 1 | 0.425518  | 3.331560  | - |  |
| 3.029318 |   |           |           |   |  |
| 52       | 1 | -2.509198 | 1.703966  |   |  |
| 3.219146 |   |           |           |   |  |
| 53       | 1 | -2.737624 | 1.596437  |   |  |
| 1.446549 |   |           |           |   |  |
| 54       | 1 | 2.511319  | -1.688704 |   |  |
| 3.225191 |   |           |           |   |  |
| 55       | 1 | 2.739936  | -1.588224 |   |  |
| 1.452299 |   |           |           |   |  |
| 56       | 6 | -0.864539 | 2.447605  |   |  |
| 1.972250 |   |           |           |   |  |
| 57       | 6 | -1.088904 | 2.684221  | - |  |
| 1.581468 |   |           |           |   |  |
| 58       | 6 | 0.867789  | -2.439151 |   |  |
| 1.980980 |   |           |           |   |  |
| 59       | 6 | -0.337857 | -2.704767 | - |  |
| 2.125559 |   |           |           |   |  |
| 60       | 1 | -0.428207 | -3.345521 | - |  |
| 3.014650 |   |           |           |   |  |
| 61       | 1 | -0.997543 | -3.092143 | - |  |
| 1.339492 |   |           |           |   |  |
| 62       | 6 | 1.087554  | -2.690819 | - |  |
| 1.571592 |   |           |           |   |  |
| 63       | 8 | 0.003735  | 2.132324  |   |  |
| 1.104101 |   |           |           |   |  |
| 64       | 8 | -1.532641 | 1.635249  | - |  |
| 1.017993 |   |           |           |   |  |
| 65       | 8 | 1.531049  | -1.639396 | - |  |
| 1.012505 |   |           |           |   |  |
| 66       | 8 | -0.002513 | -2.127187 |   |  |
| 1.113658 |   |           |           |   |  |
| 67       | 7 | 0.855636  | -3.586497 |   |  |
| 2.676269 |   |           |           |   |  |

|          |   |           |           |   |
|----------|---|-----------|-----------|---|
| 68       | 1 | 1.590232  | -3.776105 |   |
| 3.362777 |   |           |           |   |
| 69       | 7 | -0.187224 | -4.540616 |   |
| 2.441097 |   |           |           |   |
| 70       | 1 | 0.193906  | -5.397972 |   |
| 2.030334 |   |           |           |   |
| 71       | 1 | -0.698194 | -4.727734 |   |
| 3.308962 |   |           |           |   |
| 72       | 7 | 1.796066  | -3.816984 | - |
| 1.699611 |   |           |           |   |
| 73       | 1 | 1.435234  | -4.595342 | - |
| 2.255989 |   |           |           |   |
| 74       | 7 | 3.075488  | -3.919531 | - |
| 1.049111 |   |           |           |   |
| 75       | 1 | 3.149901  | -4.835266 | - |
| 0.595614 |   |           |           |   |
| 76       | 1 | 3.829203  | -3.778047 | - |
| 1.730920 |   |           |           |   |
| 77       | 7 | -1.796536 | 3.810588  | - |
| 1.712456 |   |           |           |   |
| 78       | 1 | -1.435975 | 4.586571  | - |
| 2.272312 |   |           |           |   |
| 79       | 7 | -3.074800 | 3.916633  | - |
| 1.060183 |   |           |           |   |
| 80       | 1 | -3.147985 | 4.834467  | - |
| 0.610740 |   |           |           |   |
| 81       | 1 | -3.829754 | 3.772438  | - |
| 1.740060 |   |           |           |   |
| 82       | 7 | -0.848554 | 3.596012  |   |
| 2.665748 |   |           |           |   |
| 83       | 1 | -1.582492 | 3.789254  |   |
| 3.351943 |   |           |           |   |
| 84       | 7 | 0.197934  | 4.545906  |   |
| 2.429382 |   |           |           |   |
| 85       | 1 | -0.179037 | 5.402242  |   |
| 2.012659 |   |           |           |   |
| 86       | 1 | 0.706090  | 4.736062  |   |
| 3.298231 |   |           |           |   |
| 87       | 1 | 0.996733  | 3.085129  | - |
| 1.353763 |   |           |           |   |

-----  
 HF = -2108.0326242 Hartree

Zero-point correction = 0.731894

Sum of electronic and thermal Enthalpies = -2107.256561

Sum of electronic and thermal Free Energies = -2107.375896

$(\lambda\lambda) - [Tm(L)]^{3+}$

(0 imaginary frequencies)

| Center<br>Number | Atomic<br>Number | Coordinates (Angstroms) |           |   |
|------------------|------------------|-------------------------|-----------|---|
|                  |                  | X                       | Y         | Z |
| 1                | 69               | 0.000000                | 0.000000  |   |
| 0.000000         |                  |                         |           |   |
| 2                | 7                | -0.000004               | -2.572915 |   |
| 0.000000         |                  |                         |           |   |
| 3                | 7                | 0.921545                | -1.132204 |   |
| 2.231138         |                  |                         |           |   |
| 4                | 7                | -0.921555               | 1.132205  |   |
| 2.231136         |                  |                         |           |   |
| 5                | 7                | 0.000004                | 2.572916  |   |

|          |   |           |           |   |  |
|----------|---|-----------|-----------|---|--|
| 0.000000 |   |           |           |   |  |
| 6        | 7 | 0.921558  | 1.132203  | - |  |
| 2.231135 |   |           |           |   |  |
| 7        | 7 | -0.921550 | -1.132202 | - |  |
| 2.231138 |   |           |           |   |  |
| 8        | 8 | 2.092749  | 0.913144  |   |  |
| 0.988196 |   |           |           |   |  |
| 9        | 8 | -2.092754 | -0.913143 |   |  |
| 0.988188 |   |           |           |   |  |
| 10       | 8 | 2.092750  | -0.913149 | - |  |
| 0.988188 |   |           |           |   |  |
| 11       | 8 | -2.092747 | 0.913151  | - |  |
| 0.988197 |   |           |           |   |  |
| 12       | 6 | -0.196856 | -3.269881 | - |  |
| 1.148691 |   |           |           |   |  |
| 13       | 6 | -0.223088 | -4.663770 | - |  |
| 1.178383 |   |           |           |   |  |
| 14       | 1 | -0.403269 | -5.182151 | - |  |
| 2.111721 |   |           |           |   |  |
| 15       | 6 | -0.000011 | -5.374184 |   |  |
| 0.000000 |   |           |           |   |  |
| 16       | 1 | -0.000013 | -6.457055 |   |  |
| 0.000000 |   |           |           |   |  |
| 17       | 6 | 0.223071  | -4.663771 |   |  |
| 1.178383 |   |           |           |   |  |
| 18       | 1 | 0.403249  | -5.182152 |   |  |
| 2.111722 |   |           |           |   |  |
| 19       | 6 | 0.196844  | -3.269882 |   |  |
| 1.148691 |   |           |           |   |  |
| 20       | 6 | 0.304022  | -2.486310 |   |  |
| 2.432261 |   |           |           |   |  |
| 21       | 1 | -0.709124 | -2.321196 |   |  |
| 2.812421 |   |           |           |   |  |
| 22       | 1 | 0.861226  | -3.060953 |   |  |
| 3.184893 |   |           |           |   |  |
| 23       | 6 | 0.694536  | -0.305929 |   |  |
| 3.481687 |   |           |           |   |  |
| 24       | 1 | 1.449542  | 0.482085  |   |  |
| 3.512327 |   |           |           |   |  |
| 25       | 1 | 0.836440  | -0.926874 |   |  |
| 4.377508 |   |           |           |   |  |
| 26       | 6 | -0.694546 | 0.305931  |   |  |
| 3.481685 |   |           |           |   |  |
| 27       | 1 | -1.449553 | -0.482082 |   |  |
| 3.512326 |   |           |           |   |  |
| 28       | 1 | -0.836453 | 0.926878  |   |  |
| 4.377506 |   |           |           |   |  |
| 29       | 6 | -0.304031 | 2.486310  |   |  |
| 2.432260 |   |           |           |   |  |
| 30       | 1 | 0.709114  | 2.321197  |   |  |
| 2.812423 |   |           |           |   |  |
| 31       | 1 | -0.861239 | 3.060954  |   |  |
| 3.184890 |   |           |           |   |  |
| 32       | 6 | -0.196850 | 3.269883  |   |  |
| 1.148690 |   |           |           |   |  |
| 33       | 6 | -0.223077 | 4.663772  |   |  |
| 1.178382 |   |           |           |   |  |
| 34       | 1 | -0.403261 | 5.182153  |   |  |
| 2.111720 |   |           |           |   |  |
| 35       | 6 | 0.000008  | 5.374185  |   |  |
| 0.000000 |   |           |           |   |  |
| 36       | 1 | 0.000010  | 6.457056  |   |  |
| 0.000000 |   |           |           |   |  |



|          |   |           |           |   |
|----------|---|-----------|-----------|---|
| 37       | 6 | 0.223091  | 4.663771  | - |
| 1.178382 |   |           |           |   |
| 38       | 1 | 0.403276  | 5.182152  | - |
| 2.111720 |   |           |           |   |
| 39       | 6 | 0.196859  | 3.269882  | - |
| 1.148690 |   |           |           |   |
| 40       | 6 | 0.304040  | 2.486310  | - |
| 2.432260 |   |           |           |   |
| 41       | 1 | -0.709105 | 2.321201  | - |
| 2.812423 |   |           |           |   |
| 42       | 1 | 0.861250  | 3.060952  | - |
| 3.184889 |   |           |           |   |
| 43       | 6 | 0.694547  | 0.305930  | - |
| 3.481685 |   |           |           |   |
| 44       | 1 | 1.449551  | -0.482087 | - |
| 3.512326 |   |           |           |   |
| 45       | 1 | 0.836456  | 0.926877  | - |
| 4.377506 |   |           |           |   |
| 46       | 6 | -0.694537 | -0.305927 | - |
| 3.481686 |   |           |           |   |
| 47       | 1 | -1.449542 | 0.482090  | - |
| 3.512327 |   |           |           |   |
| 48       | 1 | -0.836445 | -0.926872 | - |
| 4.377508 |   |           |           |   |
| 49       | 6 | -0.304029 | -2.486309 | - |
| 2.432261 |   |           |           |   |
| 50       | 1 | 0.709117  | -2.321197 | - |
| 2.812420 |   |           |           |   |
| 51       | 1 | -0.861235 | -3.060950 | - |
| 3.184893 |   |           |           |   |
| 52       | 6 | 2.407550  | -1.248566 | - |
| 2.033732 |   |           |           |   |
| 53       | 1 | 2.596613  | -1.935187 | - |
| 1.202610 |   |           |           |   |
| 54       | 1 | 2.935883  | -1.599537 | - |
| 2.923710 |   |           |           |   |
| 55       | 6 | 2.878486  | 0.138651  | - |
| 1.637505 |   |           |           |   |
| 56       | 6 | -2.407560 | 1.248566  | - |
| 2.033725 |   |           |           |   |
| 57       | 1 | -2.596622 | 1.935190  | - |
| 1.202606 |   |           |           |   |
| 58       | 1 | -2.935895 | 1.599533  | - |
| 2.923704 |   |           |           |   |
| 59       | 6 | -2.878495 | -0.138649 | - |
| 1.637489 |   |           |           |   |
| 60       | 6 | 2.407564  | 1.248559  | - |
| 2.033724 |   |           |           |   |
| 61       | 1 | 2.596628  | 1.935181  | - |
| 1.202605 |   |           |           |   |
| 62       | 1 | 2.935901  | 1.599524  | - |
| 2.923702 |   |           |           |   |
| 63       | 6 | 2.878495  | -0.138657 | - |
| 1.637489 |   |           |           |   |
| 64       | 6 | -2.407555 | -1.248559 | - |
| 2.033732 |   |           |           |   |
| 65       | 1 | -2.596620 | -1.935180 | - |
| 1.202611 |   |           |           |   |
| 66       | 1 | -2.935888 | -1.599528 | - |
| 2.923711 |   |           |           |   |
| 67       | 6 | -2.878486 | 0.138659  | - |
| 1.637505 |   |           |           |   |
| 68       | 7 | 4.109179  | -0.530868 | - |

|          |   |           |           |   |  |
|----------|---|-----------|-----------|---|--|
| 1.990097 |   |           |           |   |  |
| 69       | 7 | 4.942777  | 0.338606  | - |  |
| 2.772012 |   |           |           |   |  |
| 70       | 1 | 5.184809  | -0.103084 | - |  |
| 3.664834 |   |           |           |   |  |
| 71       | 1 | 5.775535  | 0.616399  | - |  |
| 2.244290 |   |           |           |   |  |
| 72       | 7 | 4.109174  | 0.530853  |   |  |
| 1.990109 |   |           |           |   |  |
| 73       | 7 | -4.109179 | -0.530856 |   |  |
| 1.990100 |   |           |           |   |  |
| 74       | 1 | -4.409522 | -1.479739 |   |  |
| 1.744065 |   |           |           |   |  |
| 75       | 7 | -4.942772 | 0.338620  |   |  |
| 2.772016 |   |           |           |   |  |
| 76       | 1 | -5.775532 | 0.616417  |   |  |
| 2.244298 |   |           |           |   |  |
| 77       | 1 | -5.184802 | -0.103068 |   |  |
| 3.664840 |   |           |           |   |  |
| 78       | 7 | -4.109172 | 0.530865  | - |  |
| 1.990111 |   |           |           |   |  |
| 79       | 1 | -4.409515 | 1.479747  | - |  |
| 1.744074 |   |           |           |   |  |
| 80       | 7 | -4.942768 | -0.338615 | - |  |
| 2.772021 |   |           |           |   |  |
| 81       | 1 | -5.775524 | -0.616411 | - |  |
| 2.244298 |   |           |           |   |  |
| 82       | 1 | -5.184804 | 0.103072  | - |  |
| 3.664843 |   |           |           |   |  |
| 83       | 1 | 4.409518  | -1.479751 | - |  |
| 1.744060 |   |           |           |   |  |
| 84       | 7 | 4.942771  | -0.338627 |   |  |
| 2.772018 |   |           |           |   |  |
| 85       | 1 | 5.184811  | 0.103060  |   |  |
| 3.664839 |   |           |           |   |  |
| 86       | 1 | 5.775523  | -0.616428 |   |  |
| 2.244292 |   |           |           |   |  |
| 87       | 1 | 4.409519  | 1.479734  |   |  |
| 1.744070 |   |           |           |   |  |

-----  
 HF = -2110.3939944 Hartree

Zero-point correction = 0.733790

Sum of electronic and thermal Enthalpies = -2109.617282

Sum of electronic and thermal Free Energies = -2109.730672

( $\lambda\delta$ ) - [Tm(L)]<sup>3+</sup> (0 imaginary frequencies)

| Center<br>Number | Atomic<br>Number | Coordinates (Angstroms) |           |   |
|------------------|------------------|-------------------------|-----------|---|
|                  |                  | X                       | Y         | Z |
| 1                | 69               | 0.023485                | 0.015286  | - |
| 0.076884         |                  |                         |           |   |
| 2                | 6                | -3.316676               | -0.969563 |   |
| 0.556066         |                  |                         |           |   |
| 3                | 6                | -4.683045               | -1.173483 |   |
| 0.379023         |                  |                         |           |   |
| 4                | 6                | -5.181374               | -1.379677 | - |
| 0.907309         |                  |                         |           |   |
| 5                | 6                | -4.288488               | -1.362689 | - |
| 1.973152         |                  |                         |           |   |
| 6                | 6                | -2.938470               | -1.099000 | - |

|          |   |           |           |   |  |
|----------|---|-----------|-----------|---|--|
| 1.729510 |   |           |           |   |  |
| 7        | 6 | -2.007915 | -0.957097 | - |  |
| 2.903665 |   |           |           |   |  |
| 8        | 6 | 0.244996  | -0.380449 | - |  |
| 3.627461 |   |           |           |   |  |
| 9        | 6 | 0.165764  | 1.138677  | - |  |
| 3.496306 |   |           |           |   |  |
| 10       | 6 | 2.320732  | 1.597605  | - |  |
| 2.465852 |   |           |           |   |  |
| 11       | 6 | 3.153296  | 1.345491  | - |  |
| 1.236620 |   |           |           |   |  |
| 12       | 6 | 4.539889  | 1.499554  | - |  |
| 1.339672 |   |           |           |   |  |
| 13       | 6 | 5.343464  | 1.182919  | - |  |
| 0.252021 |   |           |           |   |  |
| 14       | 6 | 4.726188  | 0.763699  |   |  |
| 0.928073 |   |           |           |   |  |
| 15       | 6 | 3.338550  | 0.682282  |   |  |
| 0.976822 |   |           |           |   |  |
| 16       | 6 | 2.648760  | 0.479350  |   |  |
| 2.291990 |   |           |           |   |  |
| 17       | 6 | 0.601648  | -0.054630 |   |  |
| 3.451088 |   |           |           |   |  |
| 18       | 6 | -0.850814 | -0.503950 |   |  |
| 3.374496 |   |           |           |   |  |
| 19       | 6 | -2.736490 | -0.983169 |   |  |
| 1.938958 |   |           |           |   |  |
| 20       | 6 | -0.148946 | -2.469624 | - |  |
| 2.374369 |   |           |           |   |  |
| 21       | 6 | 1.791987  | -1.831384 |   |  |
| 2.166291 |   |           |           |   |  |
| 22       | 6 | -2.035981 | 1.367914  |   |  |
| 2.244280 |   |           |           |   |  |
| 23       | 7 | -2.443565 | -0.902167 | - |  |
| 0.485190 |   |           |           |   |  |
| 24       | 7 | -0.556977 | -1.035888 | - |  |
| 2.526358 |   |           |           |   |  |
| 25       | 7 | 0.841474  | 1.569569  | - |  |
| 2.214724 |   |           |           |   |  |
| 26       | 7 | 2.545330  | 0.936166  | - |  |
| 0.101357 |   |           |           |   |  |
| 27       | 7 | 1.406589  | -0.373437 |   |  |
| 2.206753 |   |           |           |   |  |
| 28       | 7 | -1.560485 | -0.051958 |   |  |
| 2.114337 |   |           |           |   |  |
| 29       | 1 | -5.341391 | -1.198055 |   |  |
| 1.238045 |   |           |           |   |  |
| 30       | 1 | -6.236441 | -1.560302 | - |  |
| 1.070477 |   |           |           |   |  |
| 31       | 1 | -4.629658 | -1.539942 | - |  |
| 2.985718 |   |           |           |   |  |
| 32       | 1 | -2.178755 | 0.027585  | - |  |
| 3.347485 |   |           |           |   |  |
| 33       | 1 | -2.249029 | -1.704468 | - |  |
| 3.673867 |   |           |           |   |  |
| 34       | 1 | 1.281401  | -0.710743 | - |  |
| 3.533692 |   |           |           |   |  |
| 35       | 1 | -0.123769 | -0.700056 | - |  |
| 4.612419 |   |           |           |   |  |
| 36       | 1 | 0.637747  | 1.621361  | - |  |
| 4.363511 |   |           |           |   |  |
| 37       | 1 | -0.874575 | 1.465343  | - |  |
| 3.463156 |   |           |           |   |  |

|          |   |           |           |   |
|----------|---|-----------|-----------|---|
| 38       | 1 | 2.614022  | 2.550802  | - |
| 2.930589 |   |           |           |   |
| 39       | 1 | 2.549715  | 0.811161  | - |
| 3.191360 |   |           |           |   |
| 40       | 1 | 4.974984  | 1.854892  | - |
| 2.265914 |   |           |           |   |
| 41       | 1 | 6.420780  | 1.273300  | - |
| 0.312092 |   |           |           |   |
| 42       | 1 | 5.313294  | 0.533449  |   |
| 1.807994 |   |           |           |   |
| 43       | 1 | 2.314980  | 1.466731  |   |
| 2.625444 |   |           |           |   |
| 44       | 1 | 3.345967  | 0.081298  |   |
| 3.040709 |   |           |           |   |
| 45       | 1 | 0.652156  | 1.024865  |   |
| 3.594520 |   |           |           |   |
| 46       | 1 | 1.070612  | -0.518649 |   |
| 4.332573 |   |           |           |   |
| 47       | 1 | -1.383837 | -0.131139 |   |
| 4.262474 |   |           |           |   |
| 48       | 1 | -0.909455 | -1.591983 |   |
| 3.407719 |   |           |           |   |
| 49       | 1 | -3.514087 | -0.773579 |   |
| 2.685544 |   |           |           |   |
| 50       | 1 | -2.354957 | -1.996370 |   |
| 2.105231 |   |           |           |   |
| 51       | 1 | -0.137989 | -3.002104 | - |
| 3.336354 |   |           |           |   |
| 52       | 1 | 2.215365  | -2.159135 |   |
| 3.125452 |   |           |           |   |
| 53       | 1 | 2.535642  | -1.965525 |   |
| 1.370452 |   |           |           |   |
| 54       | 1 | -2.563328 | 1.532774  |   |
| 3.194190 |   |           |           |   |
| 55       | 1 | -2.719236 | 1.576653  |   |
| 1.410281 |   |           |           |   |
| 56       | 6 | 0.558838  | -2.631287 |   |
| 1.770096 |   |           |           |   |
| 57       | 6 | 1.207626  | -2.510309 | - |
| 1.676564 |   |           |           |   |
| 58       | 6 | -0.848265 | 2.308154  |   |
| 2.068111 |   |           |           |   |
| 59       | 6 | 0.366230  | 2.929196  | - |
| 1.804168 |   |           |           |   |
| 60       | 1 | 0.449928  | 3.663554  | - |
| 2.618464 |   |           |           |   |
| 61       | 1 | 0.985599  | 3.257437  | - |
| 0.960122 |   |           |           |   |
| 62       | 6 | -1.064757 | 2.798575  | - |
| 1.294020 |   |           |           |   |
| 63       | 8 | -0.190279 | -2.189777 |   |
| 0.845829 |   |           |           |   |
| 64       | 8 | 1.588758  | -1.506000 | - |
| 0.997390 |   |           |           |   |
| 65       | 8 | -1.476869 | 1.671925  | - |
| 0.872308 |   |           |           |   |
| 66       | 8 | 0.069779  | 2.000019  |   |
| 1.246901 |   |           |           |   |
| 67       | 7 | -0.856481 | 3.436403  |   |
| 2.792116 |   |           |           |   |
| 68       | 1 | -1.607182 | 3.603399  |   |
| 3.466980 |   |           |           |   |
| 69       | 7 | 0.186299  | 4.402298  |   |

|          |   |           |           |   |
|----------|---|-----------|-----------|---|
| 2.606646 |   |           |           |   |
| 70       | 1 | -0.209453 | 5.303505  |   |
| 2.323801 |   |           |           |   |
| 71       | 1 | 0.752168  | 4.484968  |   |
| 3.456820 |   |           |           |   |
| 72       | 7 | -1.821974 | 3.898953  | - |
| 1.292798 |   |           |           |   |
| 73       | 1 | -1.500147 | 4.755036  | - |
| 1.749375 |   |           |           |   |
| 74       | 7 | -3.105675 | 3.862467  | - |
| 0.635435 |   |           |           |   |
| 75       | 1 | -3.244976 | 4.745738  | - |
| 0.134081 |   |           |           |   |
| 76       | 1 | -3.847604 | 3.712268  | - |
| 1.329296 |   |           |           |   |
| 77       | 7 | 1.927182  | -3.629960 | - |
| 1.790245 |   |           |           |   |
| 78       | 1 | 1.650473  | -4.366272 | - |
| 2.443069 |   |           |           |   |
| 79       | 7 | 3.109933  | -3.783436 | - |
| 0.977850 |   |           |           |   |
| 80       | 1 | 3.154494  | -4.750416 | - |
| 0.639967 |   |           |           |   |
| 81       | 1 | 3.943384  | -3.546220 | - |
| 1.528789 |   |           |           |   |
| 82       | 7 | 0.321560  | -3.773204 |   |
| 2.433000 |   |           |           |   |
| 83       | 1 | 0.986561  | -4.110857 |   |
| 3.132626 |   |           |           |   |
| 84       | 7 | -0.892776 | -4.496043 |   |
| 2.172528 |   |           |           |   |
| 85       | 1 | -0.710525 | -5.313609 |   |
| 1.581538 |   |           |           |   |
| 86       | 1 | -1.331659 | -4.761289 |   |
| 3.059517 |   |           |           |   |
| 87       | 1 | -0.876303 | -2.950437 | - |
| 1.708974 |   |           |           |   |

-----  
HF = -2110.3650253 Hartree

Zero-point correction = 0.732504

Sum of electronic and thermal Enthalpies = -2109.588636

Sum of electronic and thermal Free Energies = -2109.705946
